# Supplementary material for: Activation of STING requires palmitoylation at the Golgi
Source: PubMed Central journal article supplement (PMC4919521; doi:10.1038/ncomms11932), 2016-06-21

# Supplementary Figure 1

**a**

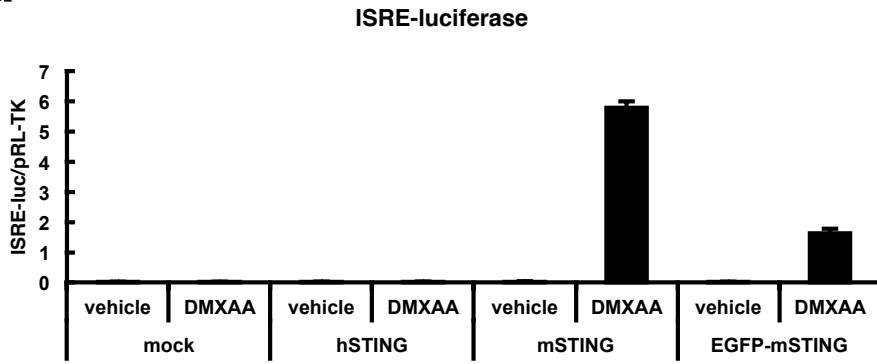

**b**

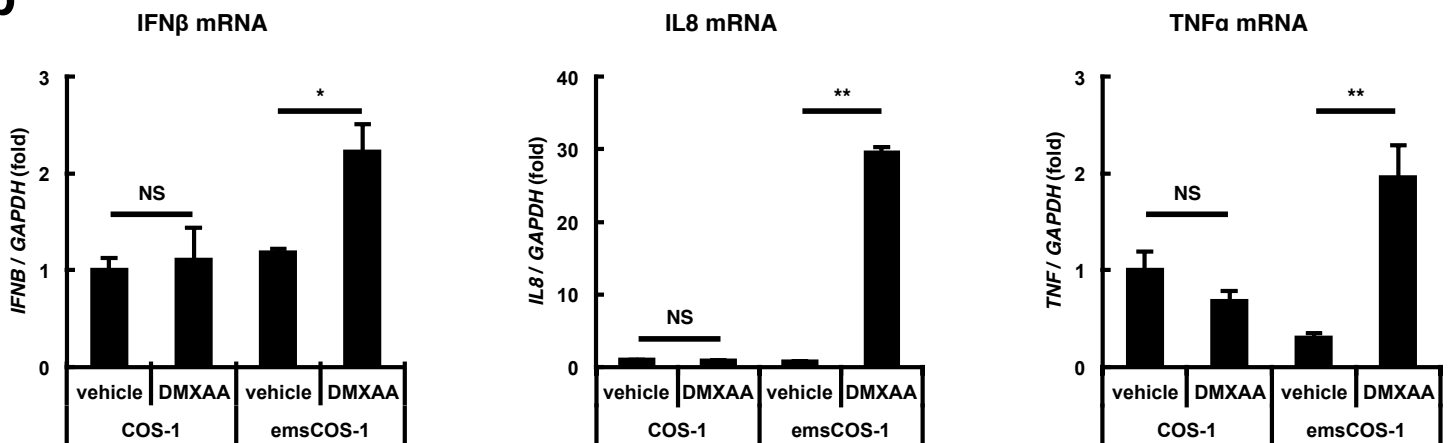

**c**

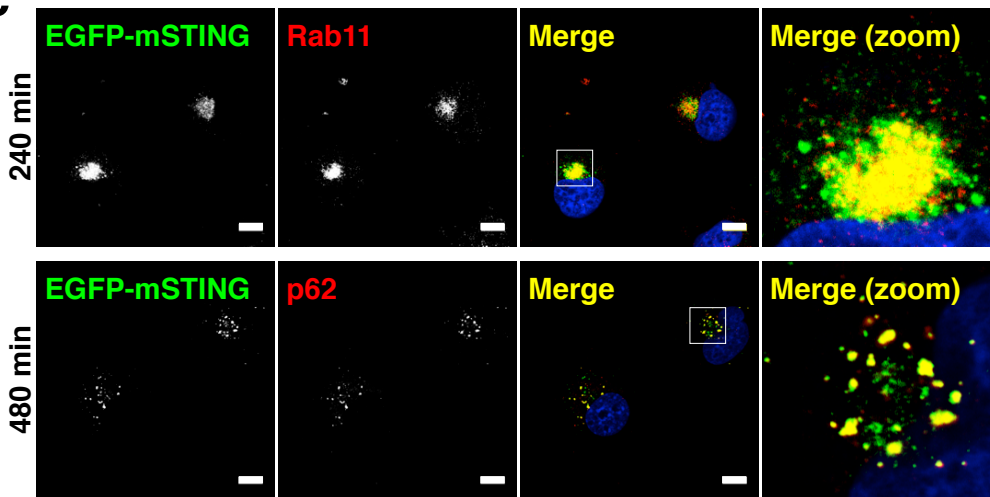

**Supplementary Figure 1. DMXAA activates the STING pathway in emsCOS-1 cells that stably express EGFP-mouse STING (emsCOS-1).** **a**, HEK293T cells were transfected as indicated, together with an ISRE (also known as PRDIII or IRF-E)-luciferase reporter, followed by stimulation of DMXAA for 12 h. Luciferase activity was then measured. Data represent mean  $\pm$  s.e.m. of two independent experiments. **b**, qRT-PCR of the expression of indicated genes in COS-1 or emsCOS-1 cells that were stimulated with DMXAA for 12 h (IFN $\beta$ ) or 6 h (IL8 and TNF $\alpha$ ). Data represent mean  $\pm$  s.e.m. from three independent experiments. \* $P < 0.01$ , \*\* $P < 0.005$ , NS, not significant (one-way ANOVA). **c**, emsCOS-1 cells were stimulated with DMXAA for the indicated times, fixed, permeabilized, and stained for Rab11 (a recycling endosomal protein) or p62 (an autophagy-associated protein). Nuclei were stained with DAPI (blue). Scale bars, 10  $\mu$ m.

# Supplementary Figure 2

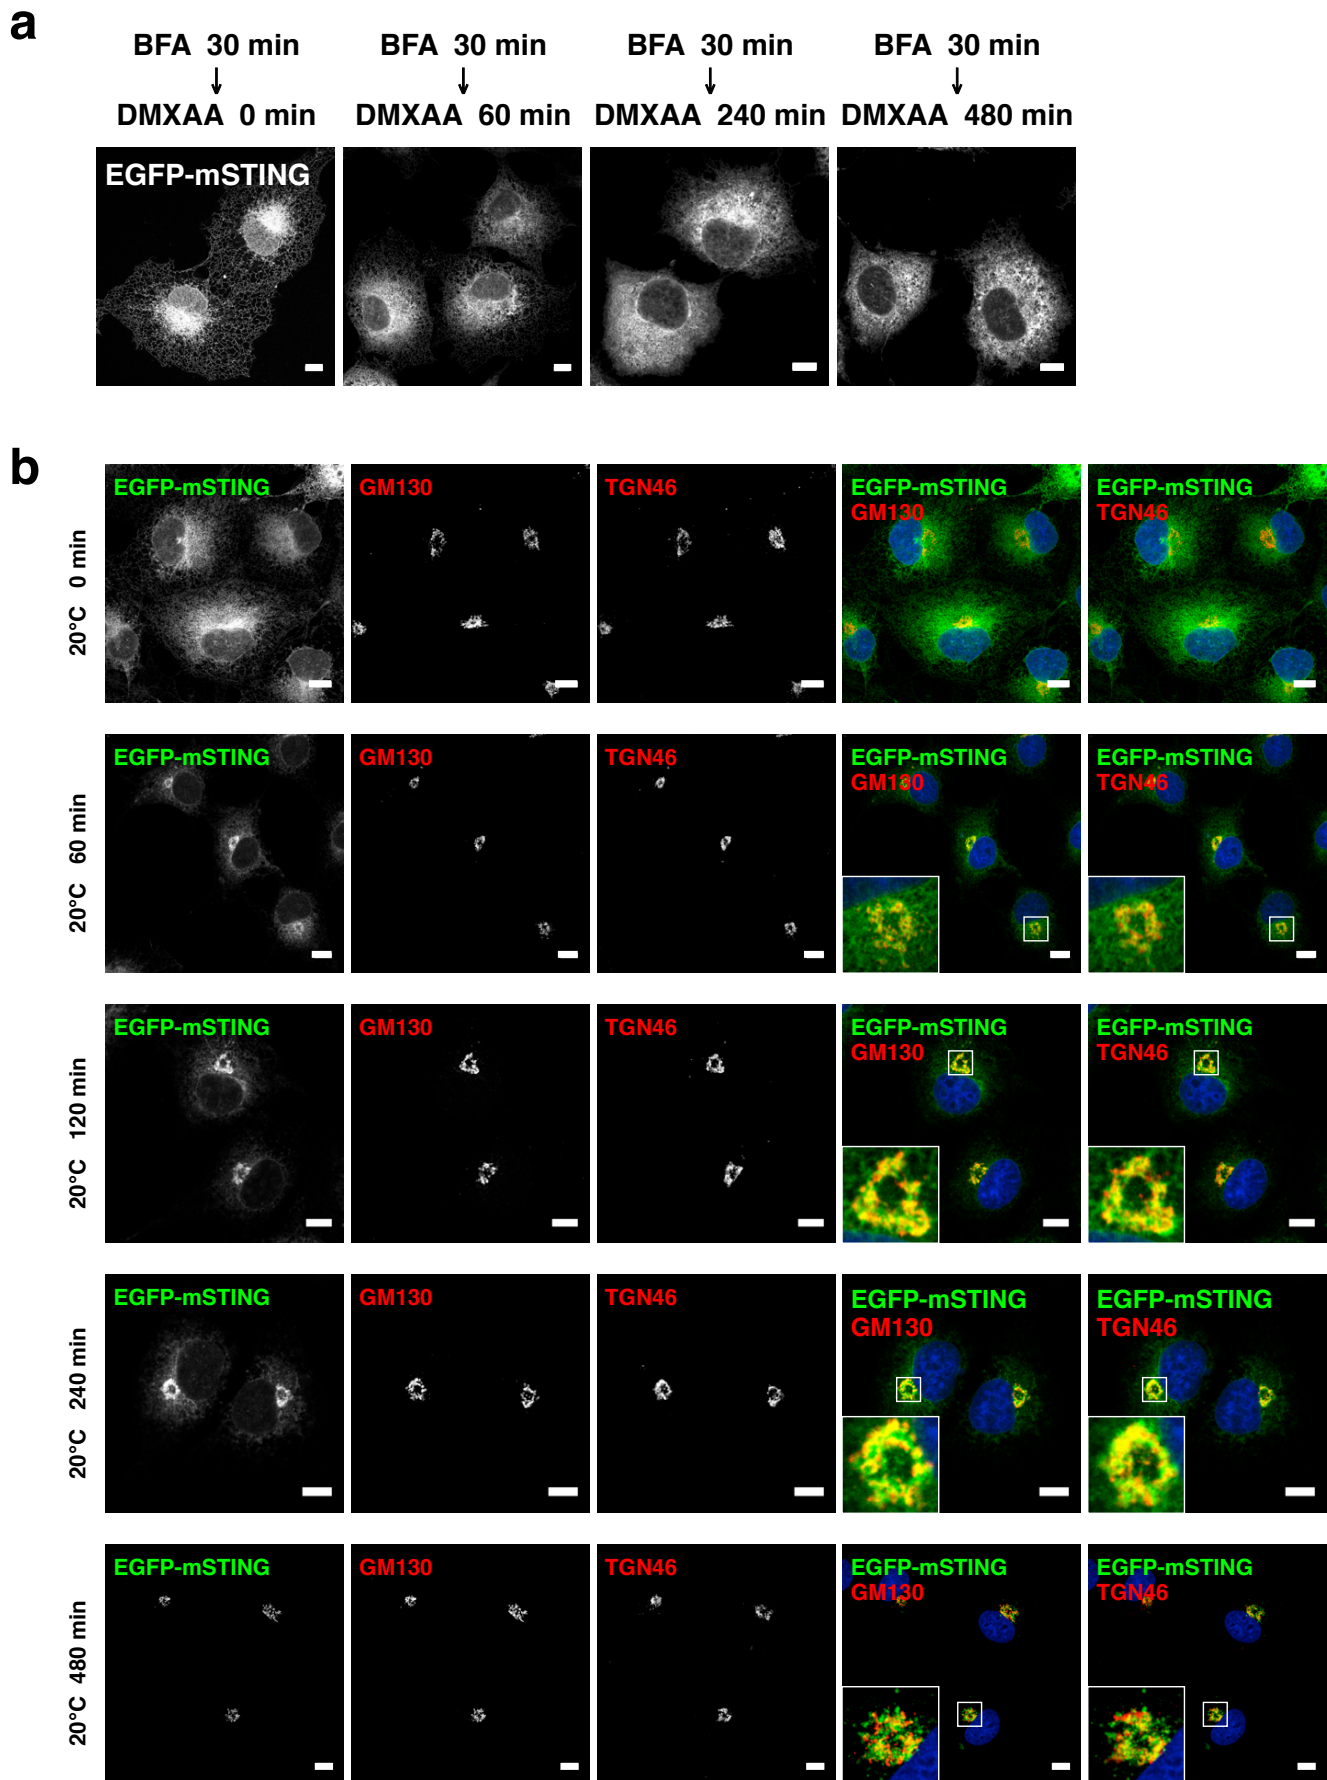

**Supplementary Figure 2. Effects of BFA and 20 °C treatment on STING traffic.** **a**, emsCOS-1 cells were treated with BFA ( $0.3 \mu\text{g mL}^{-1}$ ) for 30 min. Cells were stimulated with DMXAA for the indicated times and then fixed. **b**, emsCOS-1 cells were precultured at 20 °C for 30 min. Cells were then stimulated with DMXAA for the indicated times, fixed, and stained for GM130 (a CGN protein) or TGN46 (a TGN protein). Scale bars, 10  $\mu\text{m}$ .

# Supplementary Figure 3

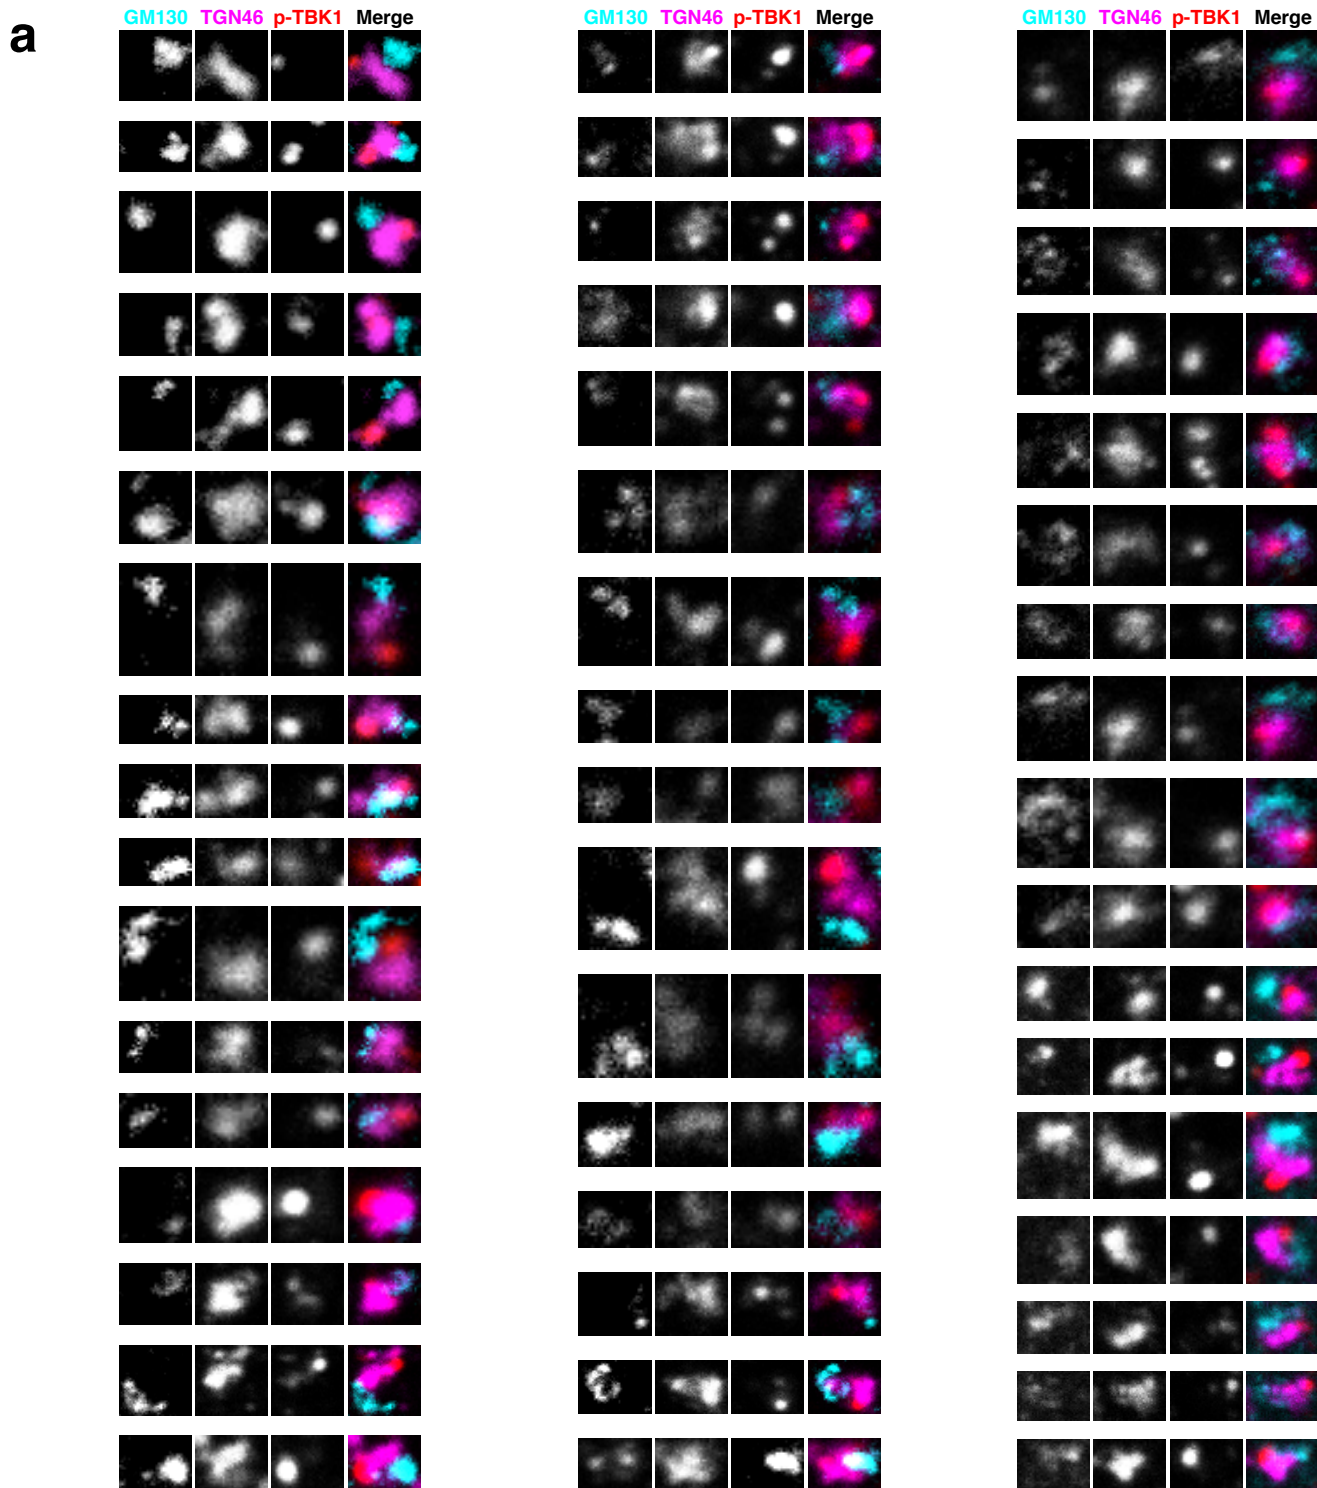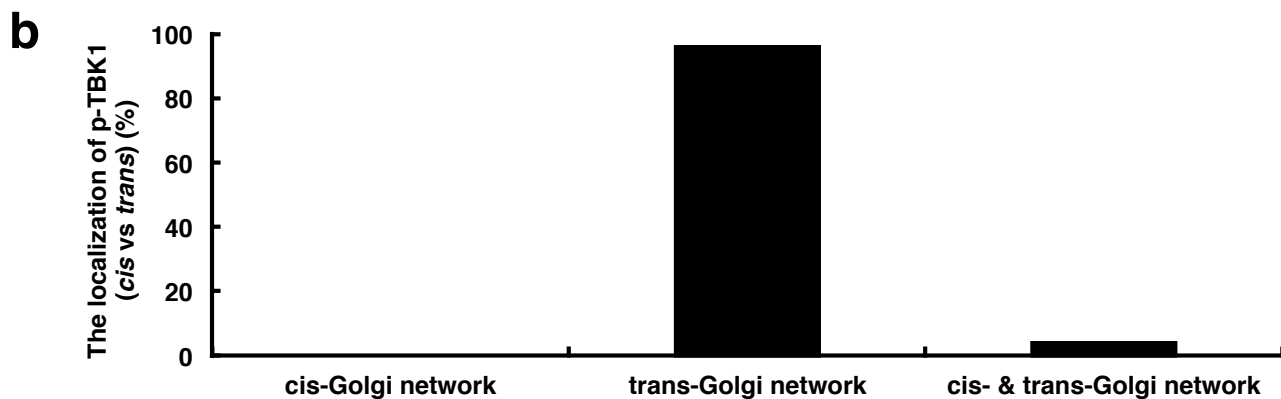

**Supplementary Figure 3. Quantification of p-TBK1 localization in the Golgi, related to Figure 1e. a**, 50 mini-Golgi stacks in *emsCOS-1* cells treated with nocodazole and DMXAA (8 cells). Cells were triple labelled with phosphorylated TBK1 (red), GM130 (a CGN protein, cyan) and TGN46 (a TGN protein, magenta). **b**, Quantification of p-TBK1 localization in the mini-Golgi in (a).

# Supplementary Figure 4

**a**

primary MEFs stimulated with ISD

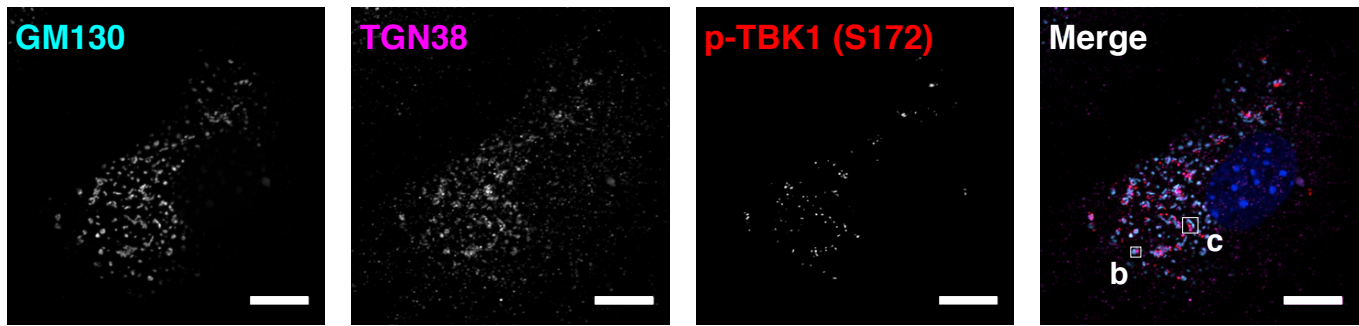

**b**

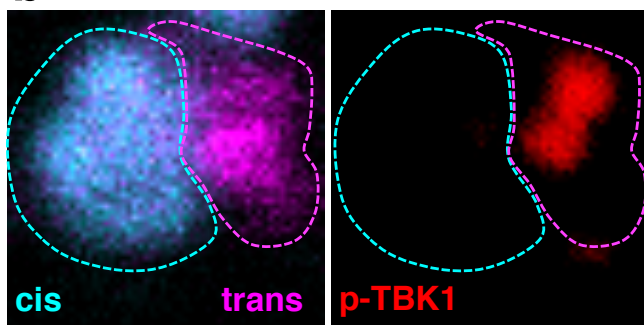

**c**

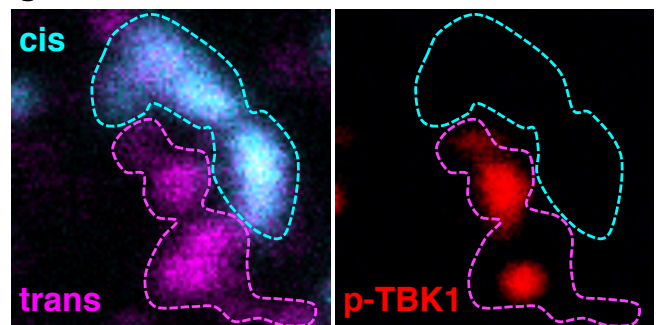

**d**

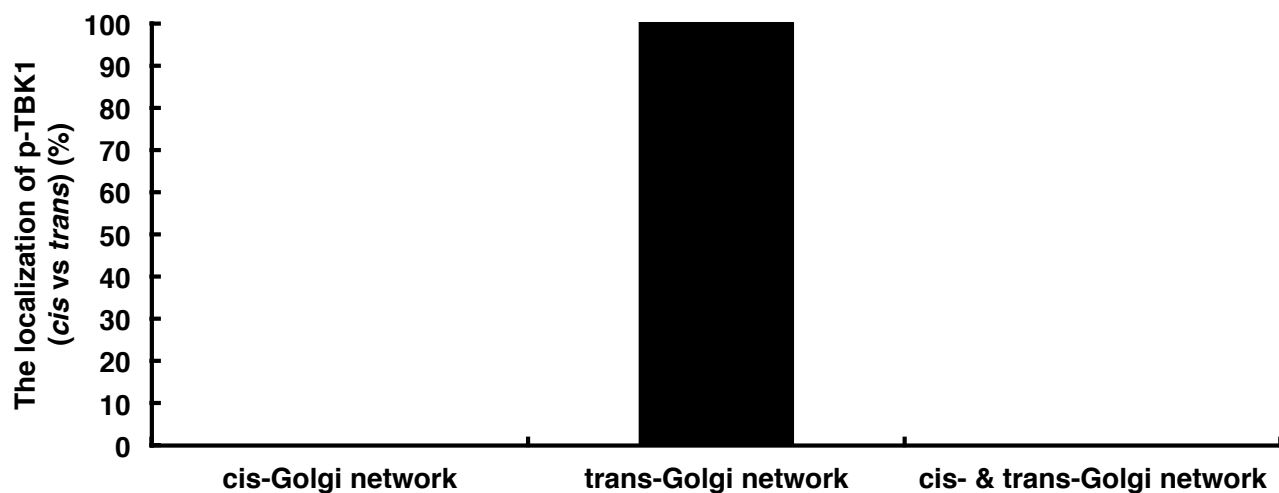

**Supplementary Figure 4. Phosphorylated TBK1 is localized to the TGN in ISD-stimulated primary MEFs.** **a**, Immunostaining of phosphorylated TBK1 (red) in cells treated with nocodazole and ISD. GM130 (a CGN protein, cyan) and TGN46 (a TGN protein, magenta) were co-stained. Scale bars, 10  $\mu$ m. **b-c**, The mini-Golgi stacks indicated by the boxes in (**a**) were magnified. The *cis* and *trans*-regions of the mini-Golgi stacks were outlined with dashed line. **d**, Quantification of p-TBK1 localization in 27 mini-Golgi stacks.

# Supplementary Figure 5

**a**

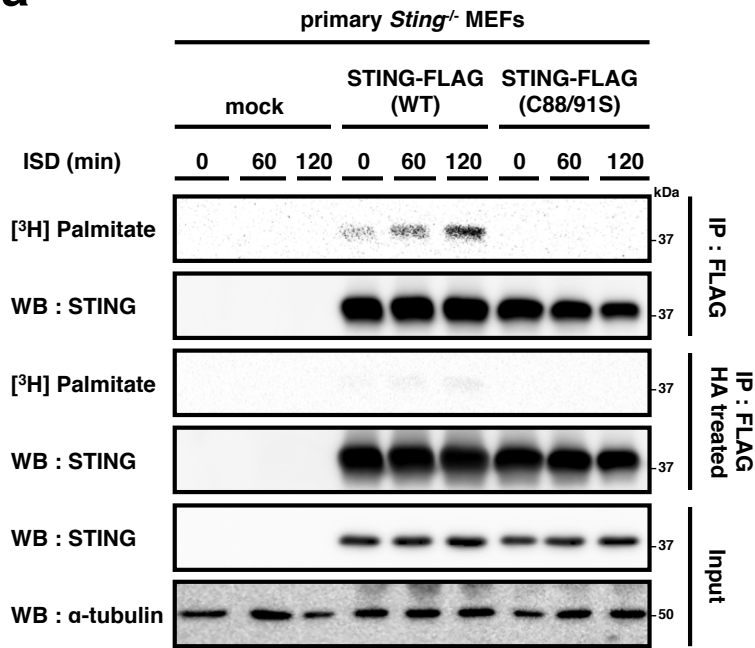

**b**

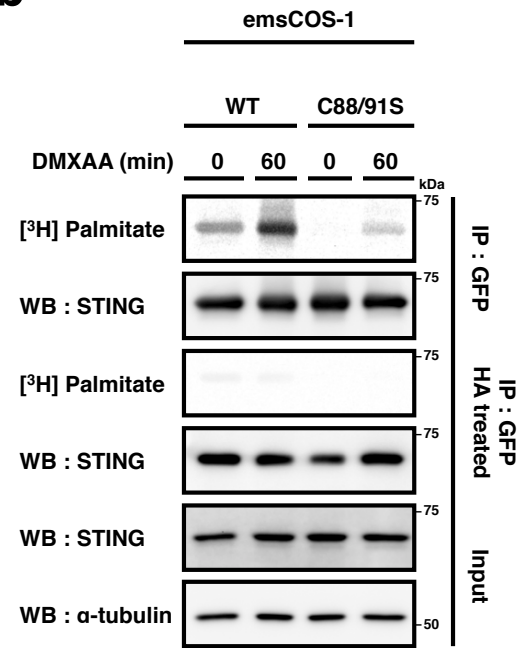

**Supplementary Figure 5. Hydroxylamine treatment of STING labelled with [<sup>3</sup>H]-palmitate.** **a**, Primary *Sting*<sup>-/-</sup> MEFs were reconstituted with human STING-FLAG (WT or C88/91S) using retroviruses. The cells were metabolically labelled, stimulated with ISD for the indicated times, and analyzed by Western blot and autoradiography. For acyl thioester analysis, membranes were soaked in 1 M hydroxylamine. **b**, COS-1 cells that stably express EGFP-mouse STING (WT or C88/91S) were stimulated with DMXAA, and analyzed as in (a).

# Supplementary Figure 6

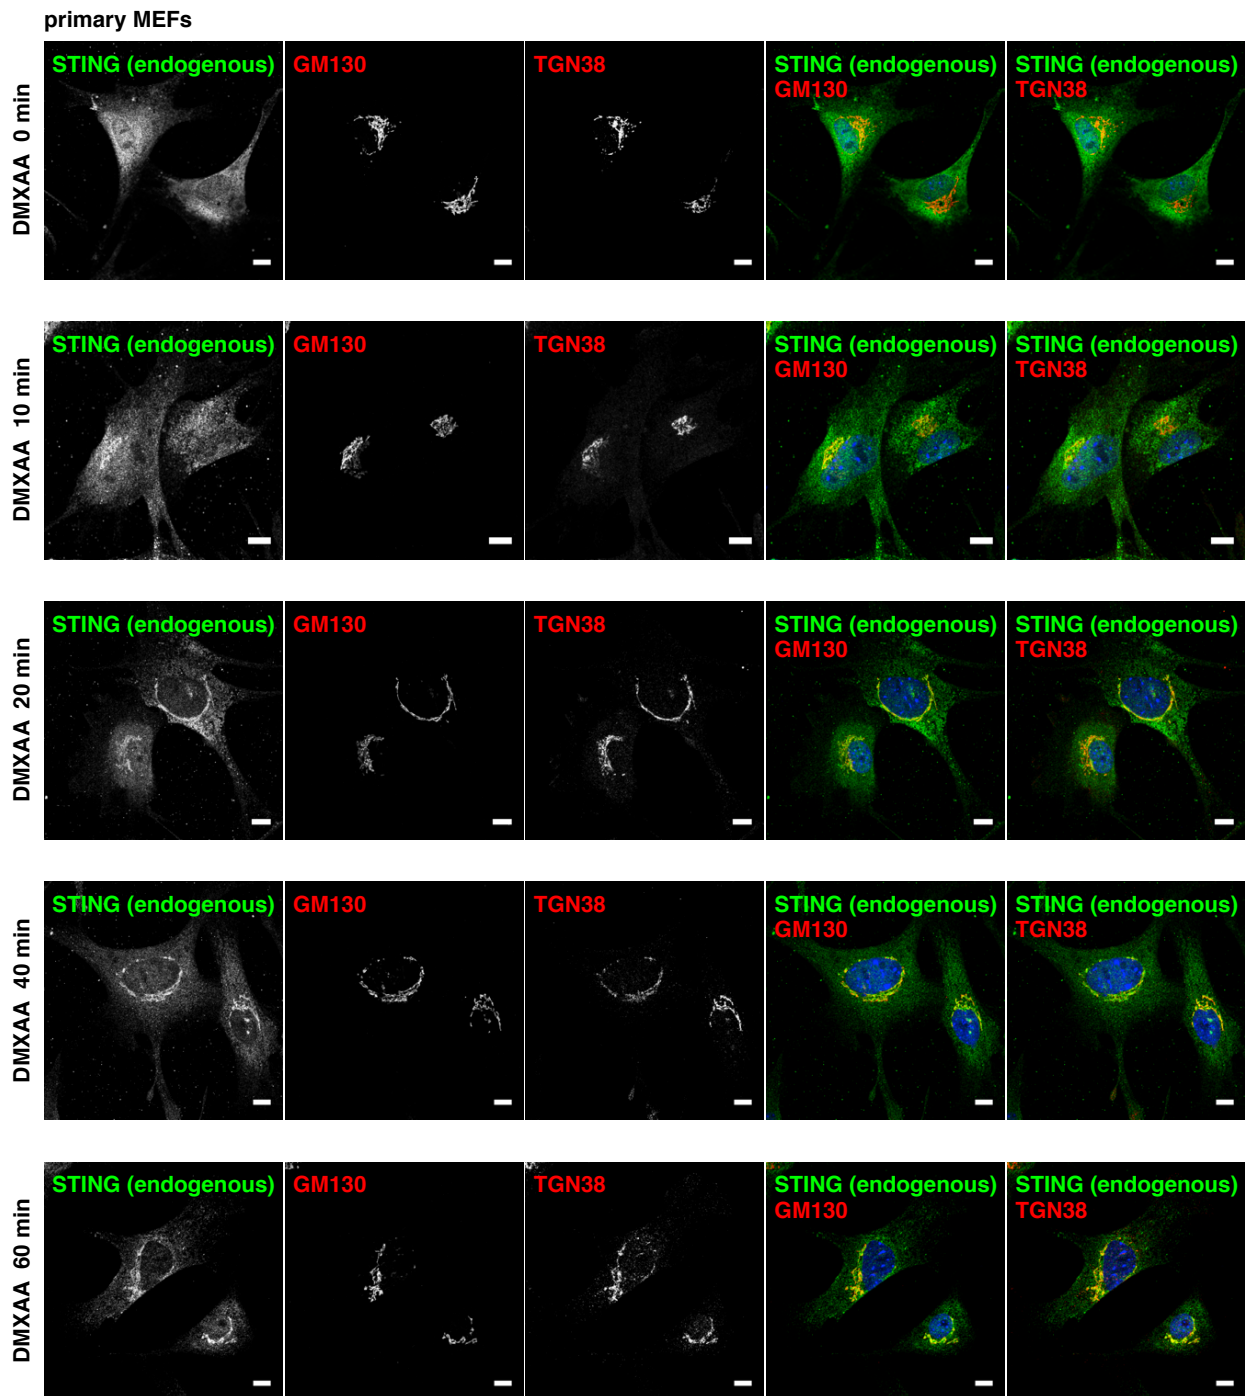

**Supplementary Figure 6. Translocation of endogenous STING in primary MEFs.** Primary MEFs were stimulated with DMXAA for the indicated times, fixed, permeabilized, and stained for STING, GM130, and TGN38 as indicated. Nuclei were stained with DAPI (blue). Scale bars, 10  $\mu$ m.

# Supplementary Figure 7

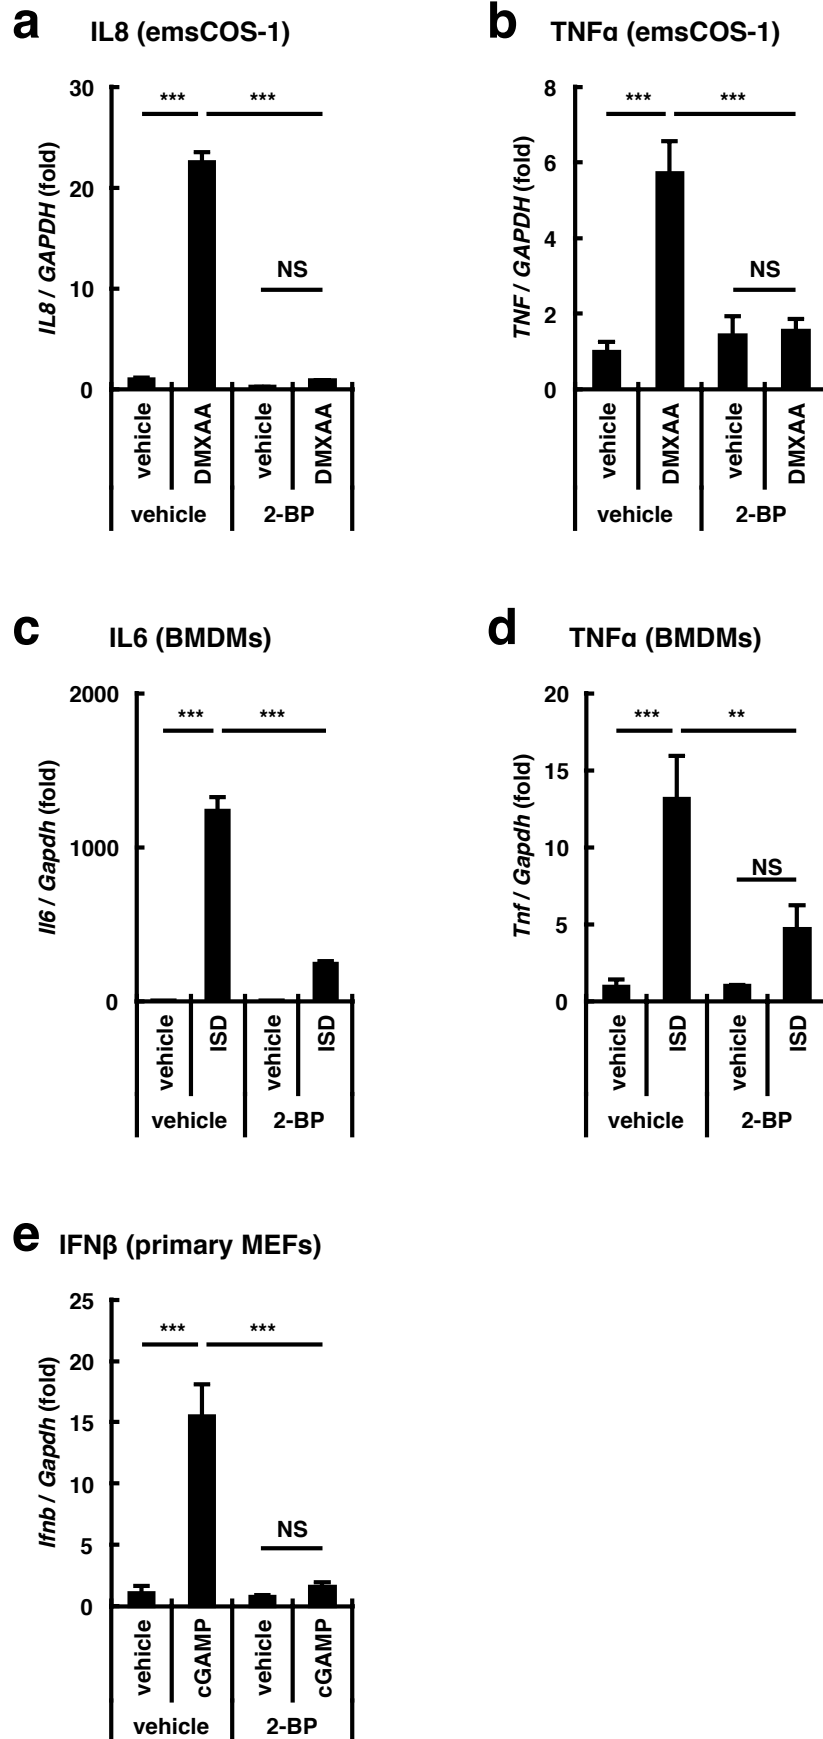

**Supplementary Figure 7. 2-BP suppresses the STING-dependent type I interferon response and inflammatory response, related to Figure 2(d-f).** **a** and **b**, qRT-PCR of the expression of IL8 and TNF $\alpha$  in emsCOS-1 cells that were pretreated with vehicle or 50  $\mu$ M 2-BP for 1 h and then stimulated with DMXAA for 6 h. **c** and **d**, qRT-PCR of the expression of IL6 and TNF $\alpha$  in BMDMs that were pretreated with vehicle or 50  $\mu$ M 2-BP for 1 h and then stimulated with ISD for 3 h. **e**, qRT-PCR of the expression of IFN $\beta$  in primary MEFs that were pretreated with vehicle or 50  $\mu$ M 2-BP for 1 h and then stimulated with cGAMP for 3 h. \*\*P < 0.005, \*\*\*P < 0.001, NS, not significant (one-way ANOVA).

# Supplementary Figure 8

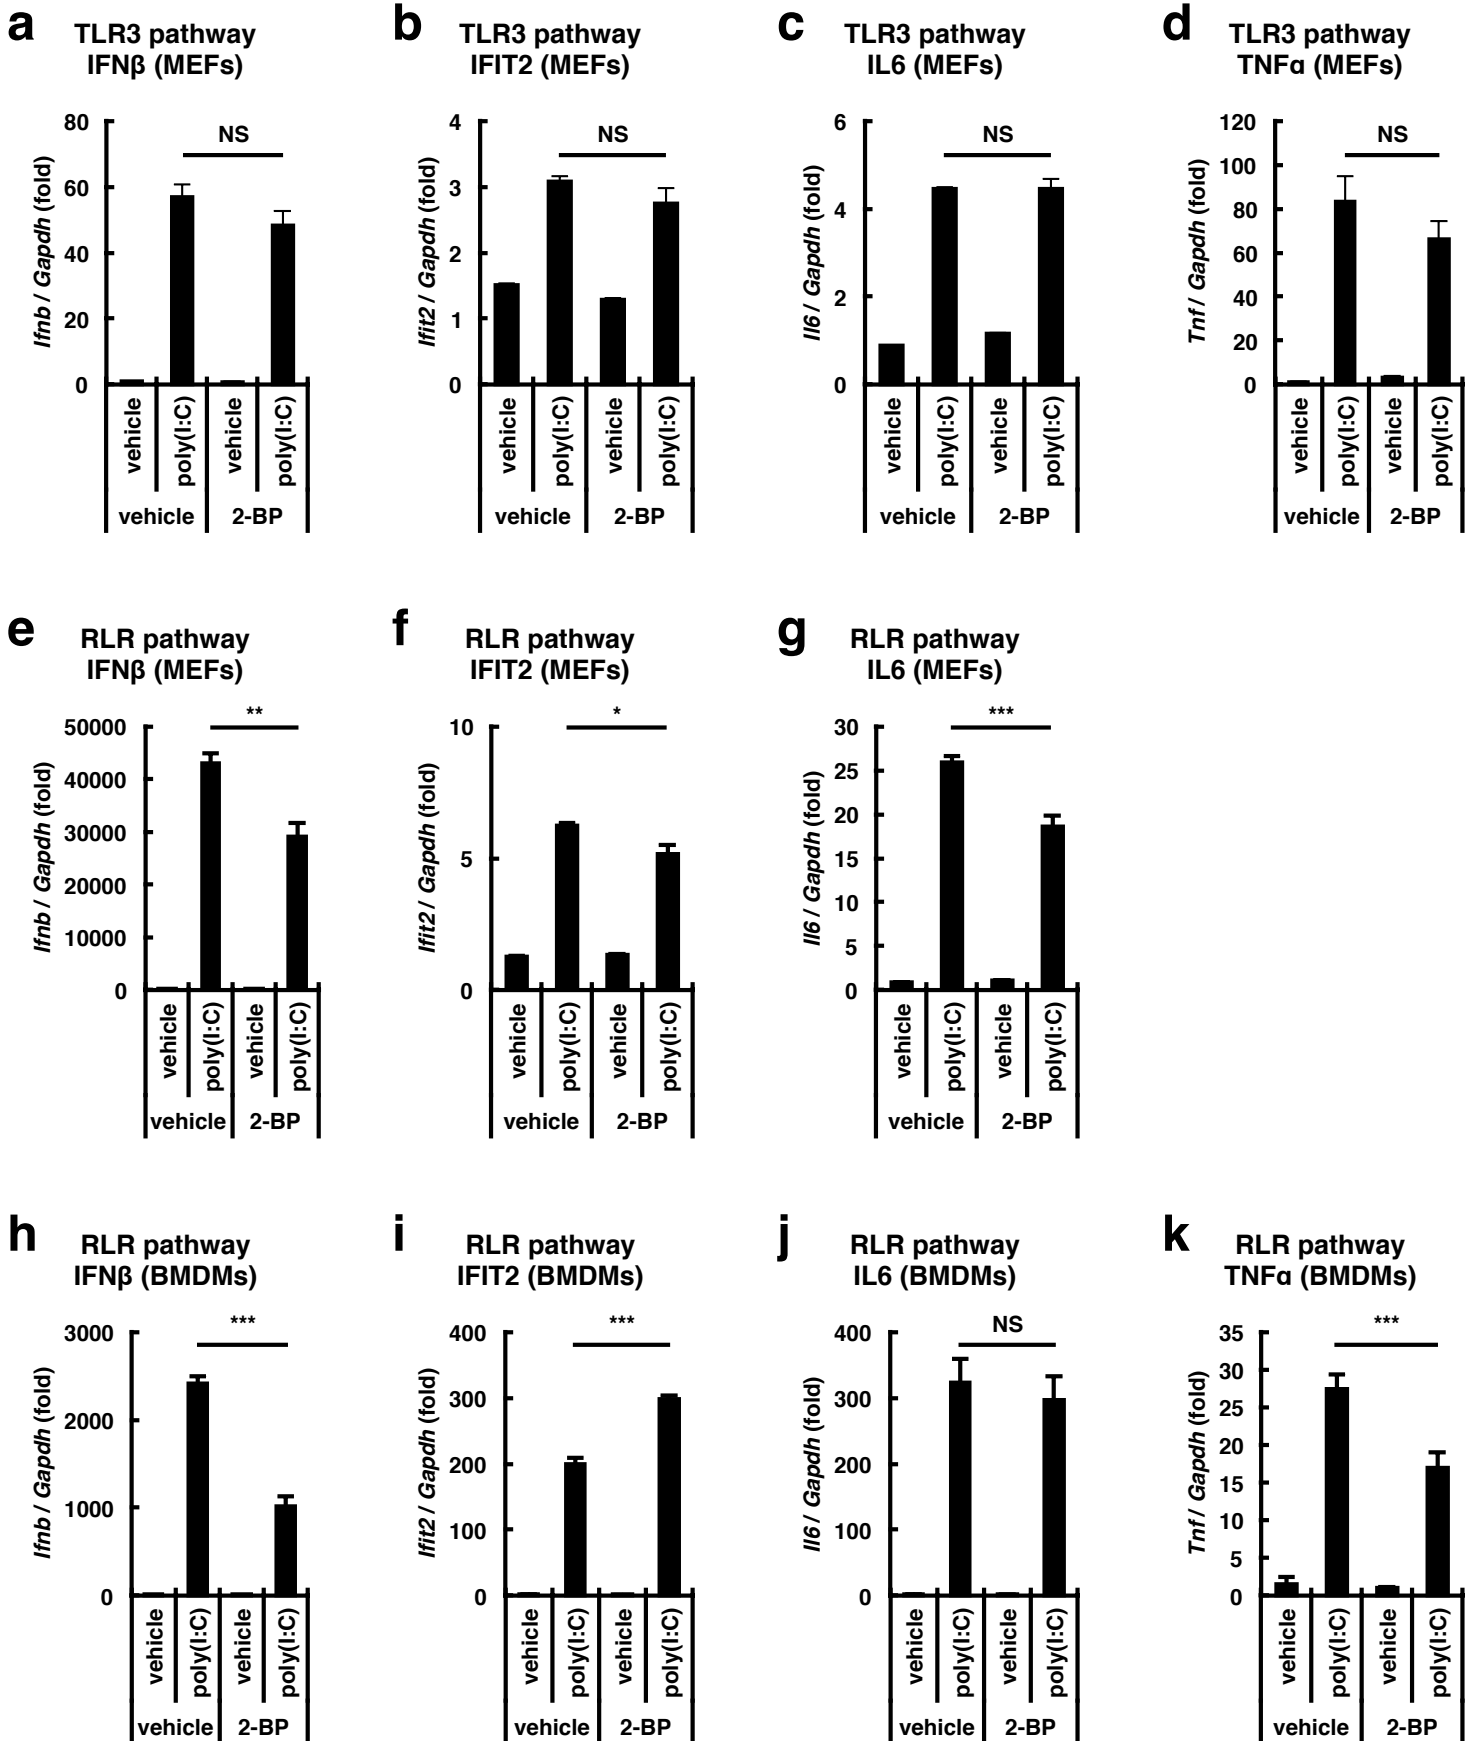

**Supplementary Figure 8. The effect of 2-BP on the TLR3 and RLR pathways.** a-d, qRT-PCR of the expression of indicated genes in MEFs that were pretreated with vehicle or 50  $\mu$ M 2-BP for 1 h and then stimulated with the supplementation of poly (I:C) for 3 h to activate the TLR3 pathway. e-g, qRT-PCR of the expression of indicated genes in MEFs that were pretreated with vehicle or 50  $\mu$ M 2-BP for 1 h and then stimulated with the transfection of poly (I:C) for 3 h to activate the RLR pathway. h-k, qRT-PCR of the expression of indicated genes in BMDMs that were pretreated with vehicle or 50  $\mu$ M 2-BP for 1 h and then stimulated with the transfection of poly (I:C) for 3 h to activate the RLR pathway. \*P < 0.01, \*\*P < 0.005, \*\*\*P < 0.001, NS, not significant (one-way ANOVA).



# Supplementary Figure 9

**a**

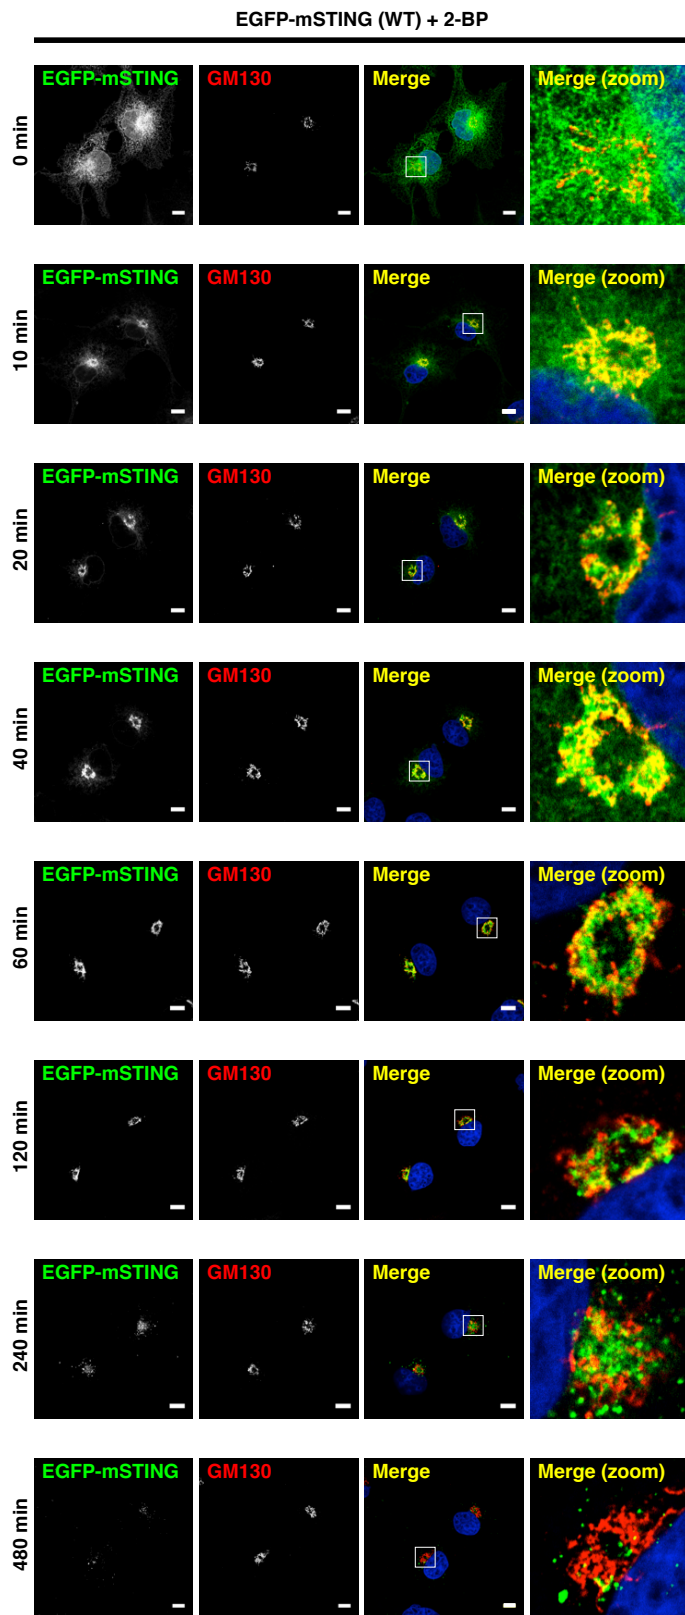

**b**

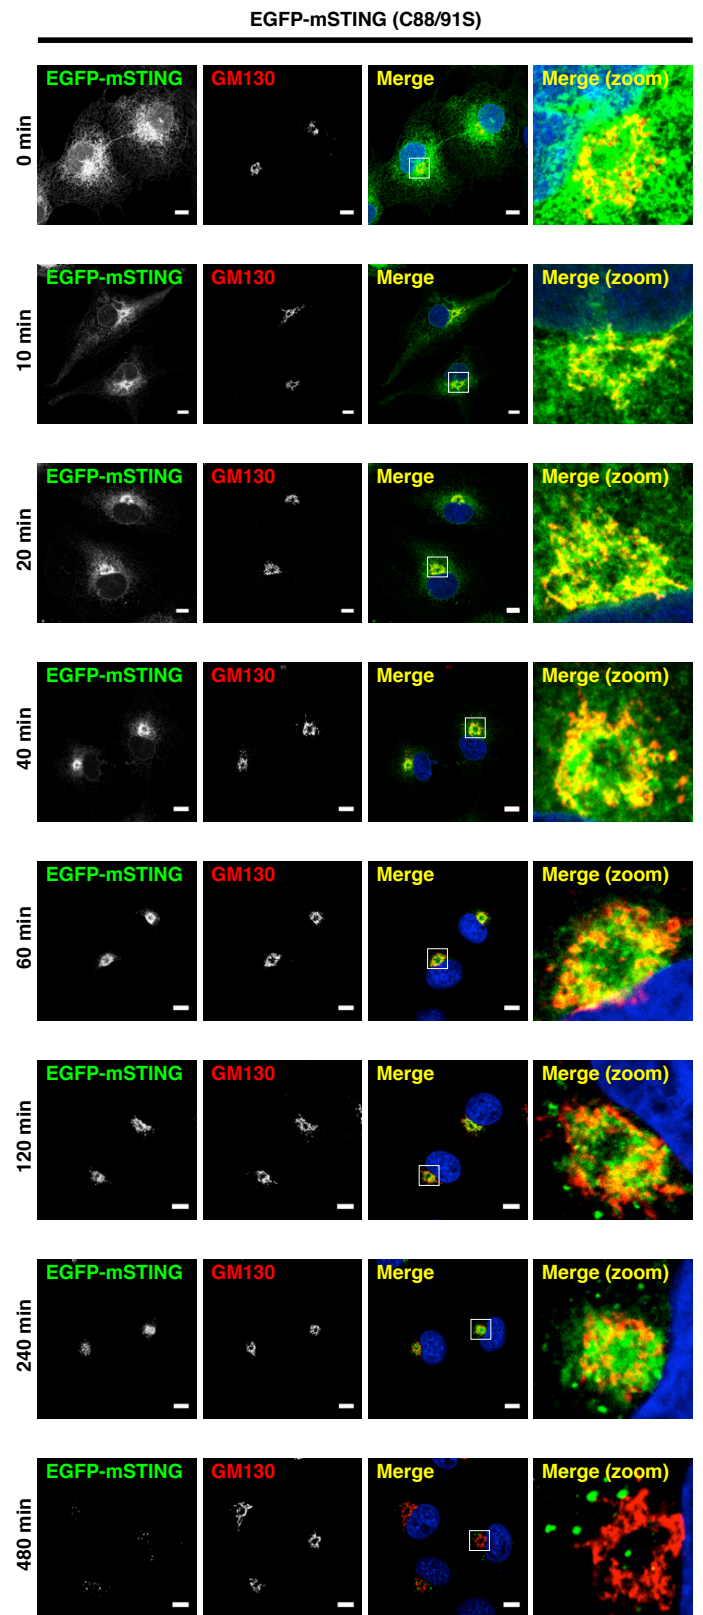

**Supplementary Figure 9. Palmitoylation of STING is not essential for the post-ER trafficking.** **a**, emsCOS-1 cells were treated with 50  $\mu$ M 2-BP for 60 min, stimulated with DMXAA for the indicated times, fixed, and stained for GM130. **b**, COS-1 cells that stably express EGFP-mSTING (C88/91S) were stimulated with DMXAA for the indicated times, fixed, and stained for GM130. Scale bar, 10  $\mu$ m.

# Supplementary Figure 10

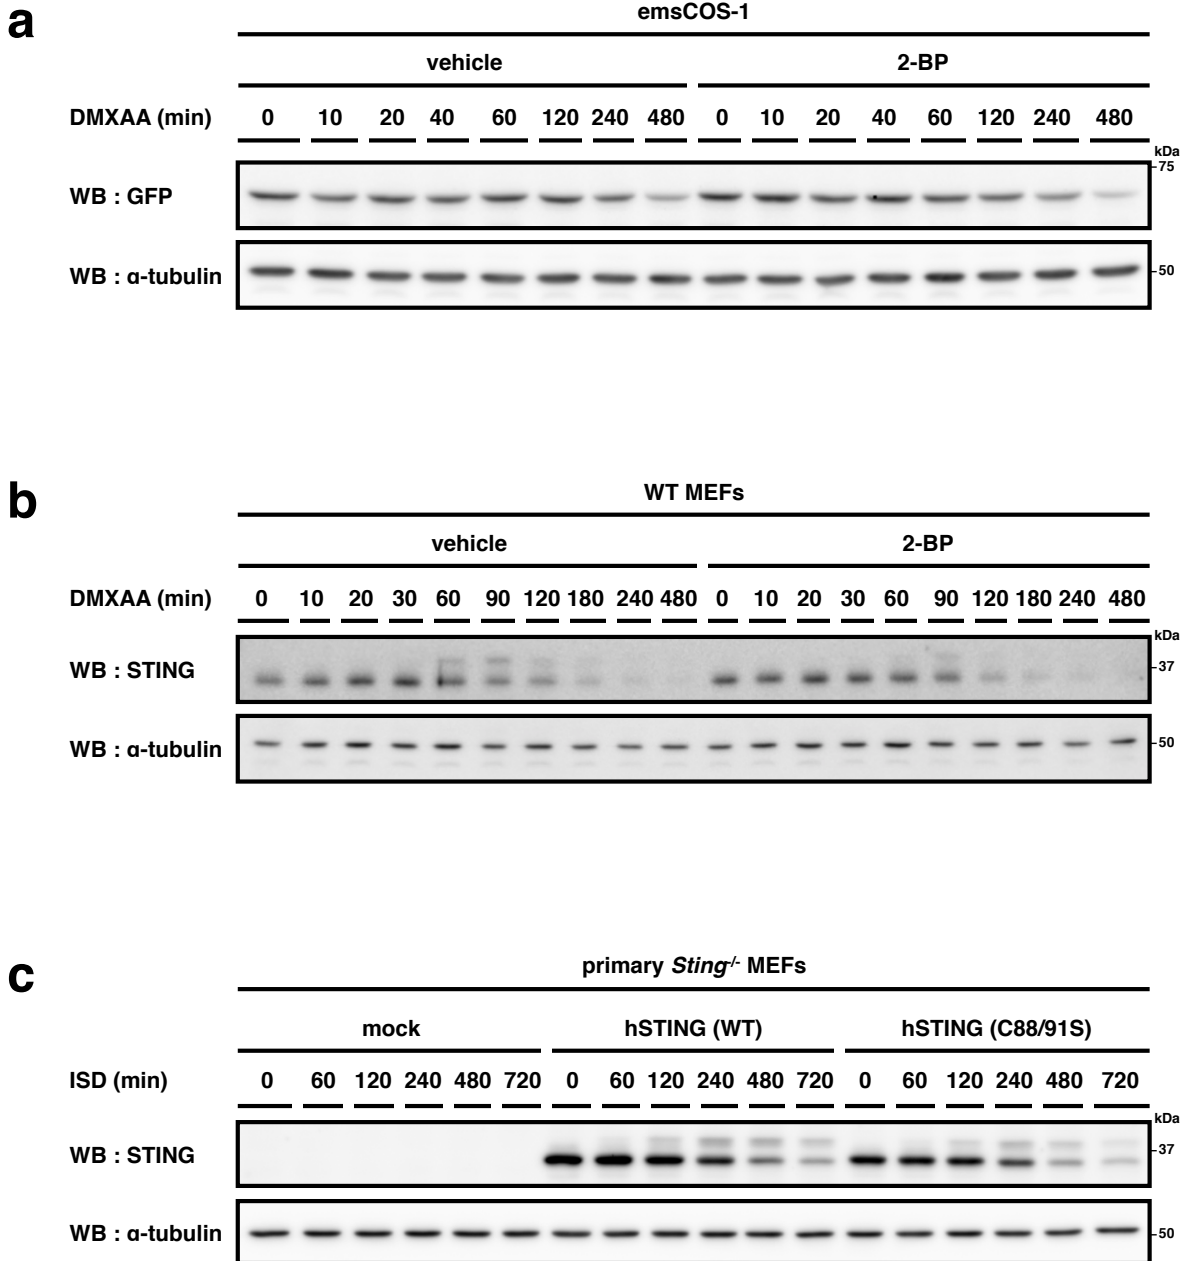

**Supplementary Figure 10. Treatment with 2-BP or the mutation of C88/91 did not affect the degradation rate of STING.** **a**, Western blots of cell lysates of emsCOS-1 cells that were pretreated with vehicle or 50  $\mu$ M 2-BP for 1 h and then stimulated with DMXAA for the indicated times. **b**, Western blots of cell lysates of MEFs that were pretreated with vehicle or 50  $\mu$ M 2-BP for 1 h and then stimulated with DMXAA for the indicated times. **c**, Primary *Sting*<sup>-/-</sup> MEFs were reconstituted with hSTING (WT) or hSTING (C88/91S). Cells were stimulated with ISD for the indicated times and the cell lysates were analyzed by Western blots.

# Supplementary Figure 11

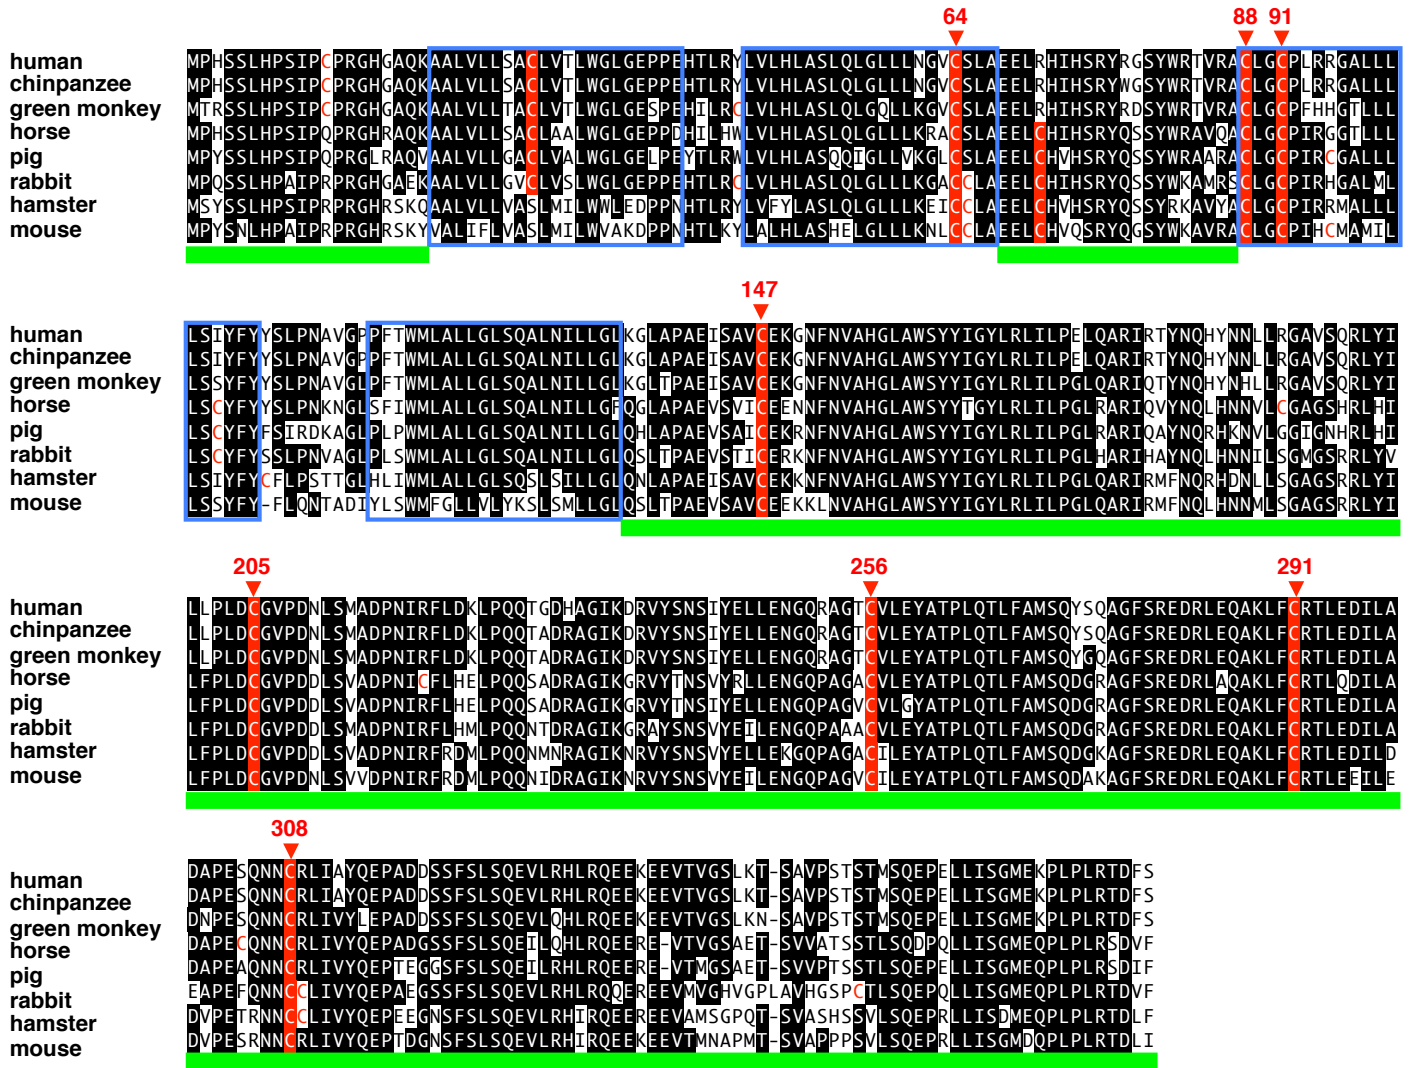

**Supplementary Figure 11. Conserved cysteine residues of STING in mammals.** Alignment of the amino acid sequence of mammalian STING proteins. Red letter indicates cysteine residue, blue box indicates transmembrane region, and green underline indicates the cytosolic region.

# Supplementary Figure 12

**a**

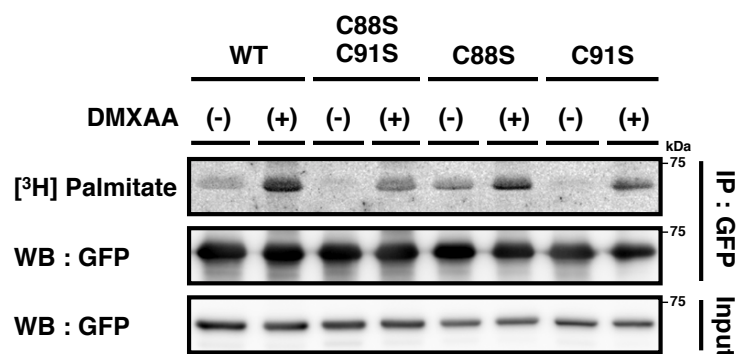

**b**

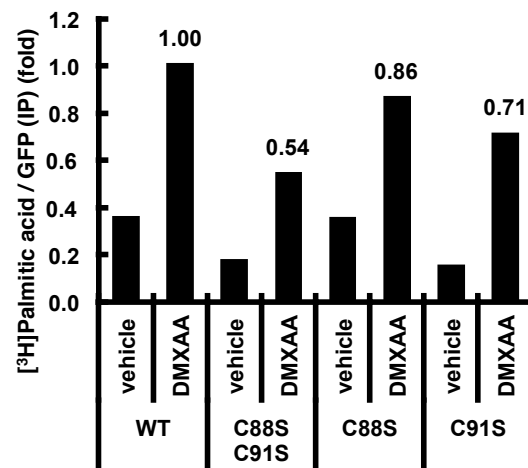

**Supplementary Figure 12. Effects of single mutation of Cys88 or Cys91 on STING palmitoylation. a,** COS-1 cells that stably express EGFP-mouse STING with the indicated Cys substitutions were metabolically labelled, and analyzed by Western blot and autoradiography. **b,** The band intensities (**a**) were quantified and [<sup>3</sup>H palmitate]/[GFP] were calculated. The data were normalized to the value of WT-STING with DMXAA treatment.

# Supplementary Figure 13

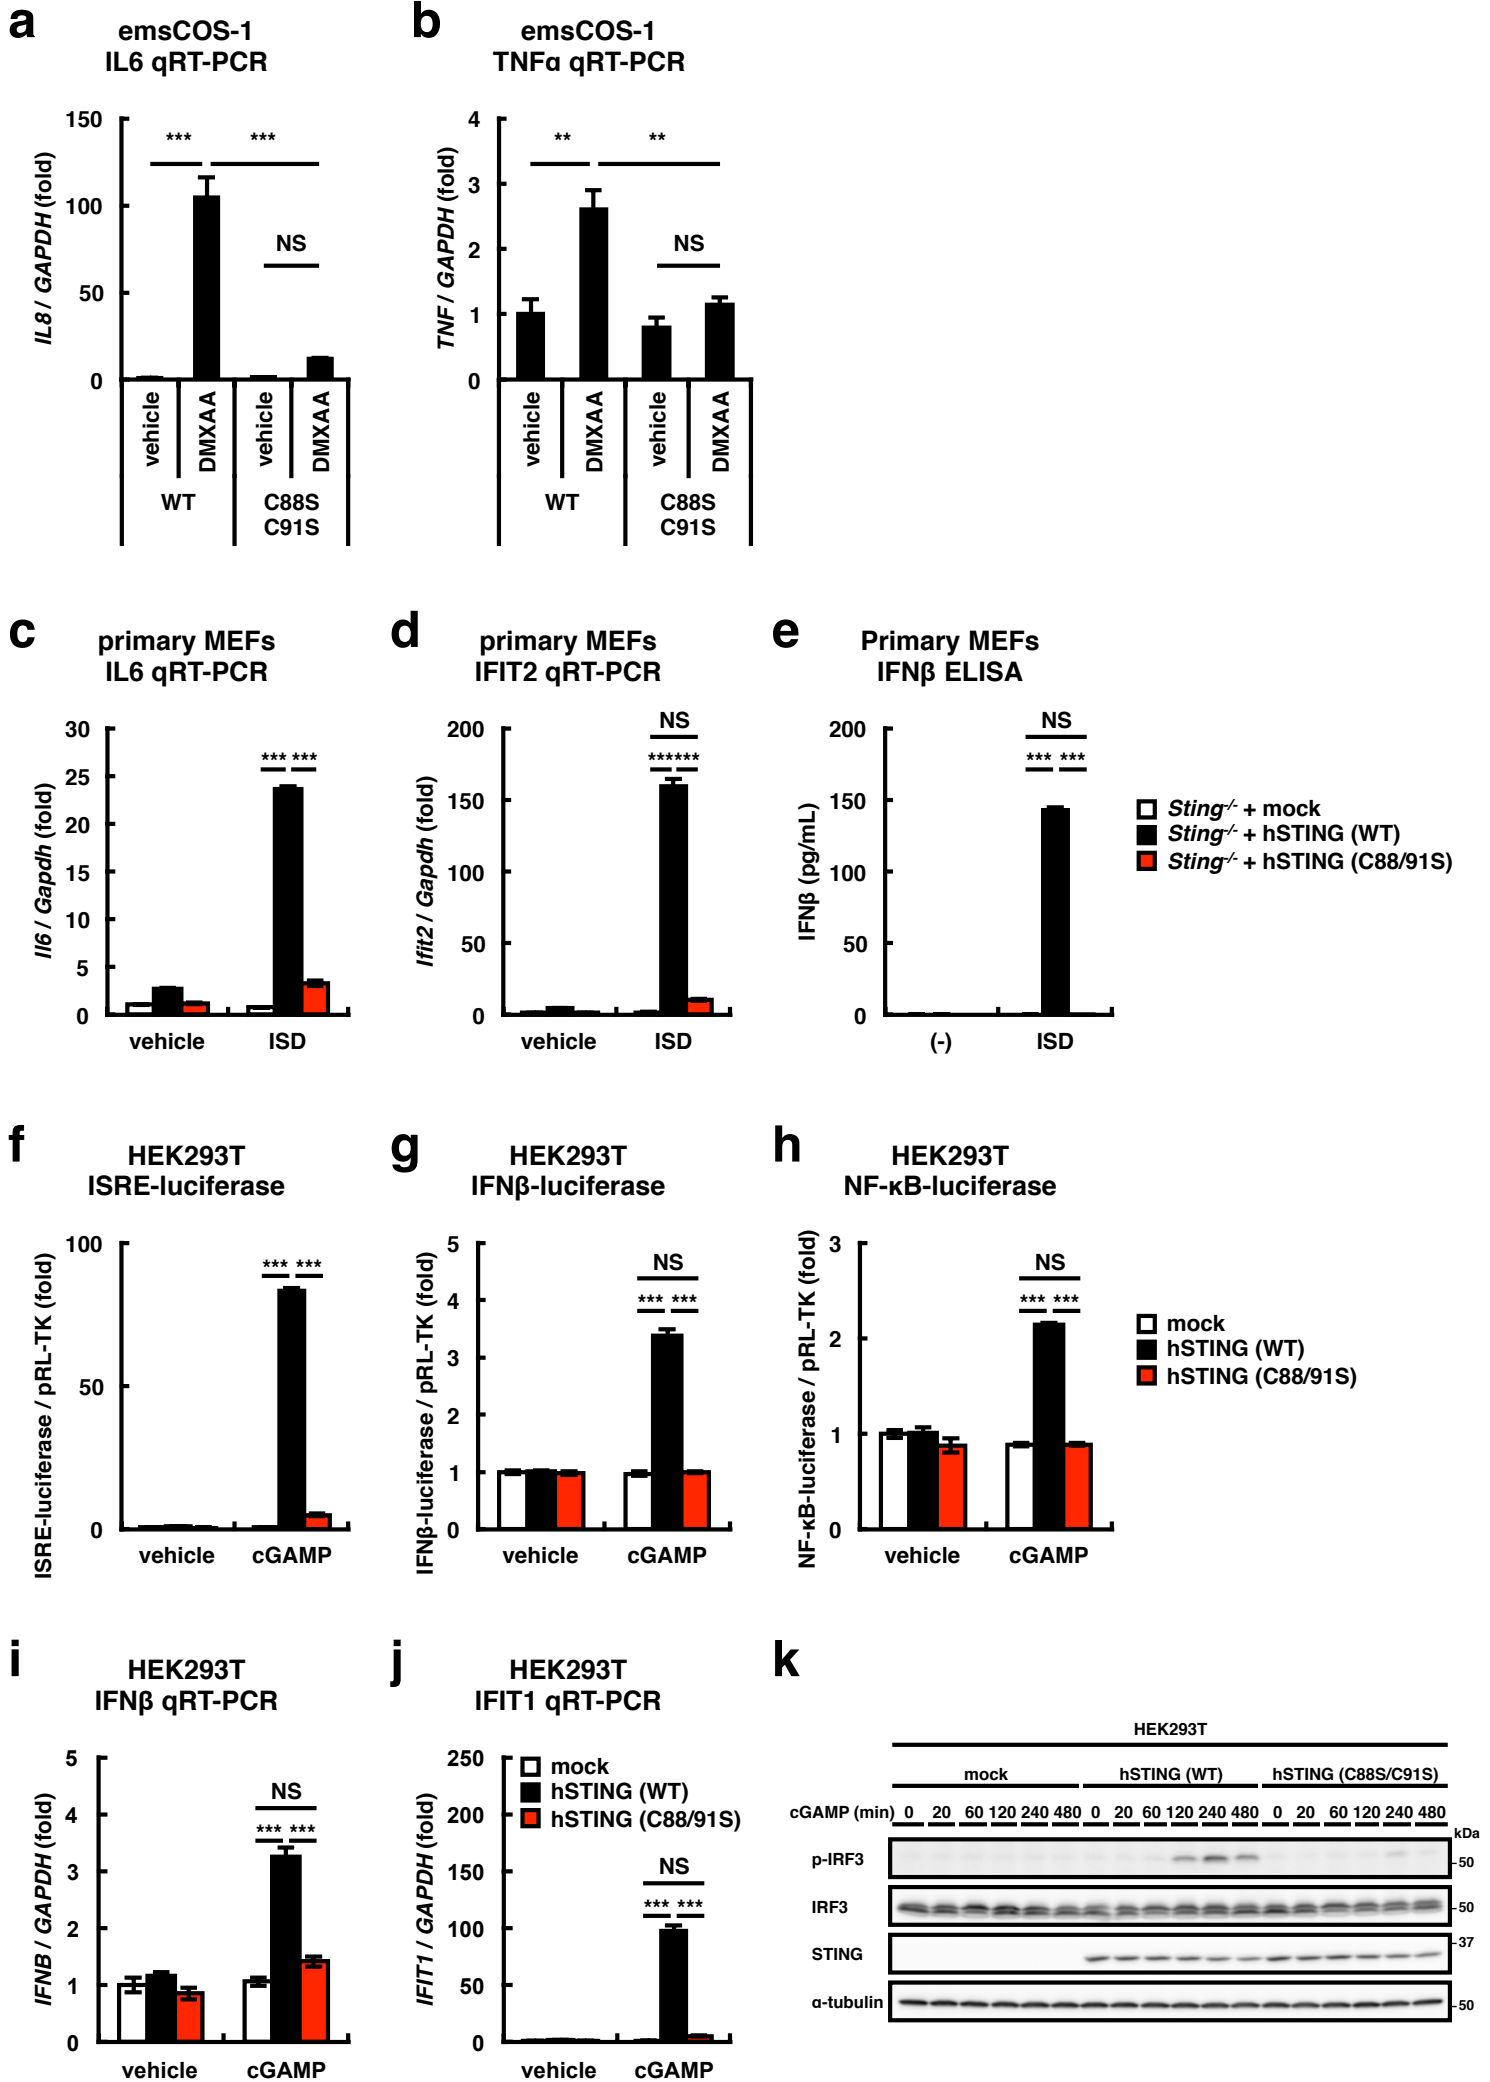

**Supplementary Figure 13. STING C88/91S mutant is unable to induce the type I interferon response elicited by DMXAA, cGAMP, or ISD.** **a** and **b**, COS-1 cells that stably express STING (WT or C88/91S) were stimulated with DMXAA for 6 h. qRT-PCR of the expression of the indicated genes was then performed. **c-e**, Primary *Sting*<sup>-/-</sup> MEFs were reconstituted with human STING variants using retroviruses, and stimulated with ISD for 6 h (**c** and **d**) or for 12 h (**e**). In (**c** and **d**), qRT-PCR of the expression of the indicated genes was performed. In (**e**), the concentration of IFN $\beta$  was measured by ELISA. **f-h**, HEK293T cells were transfected as indicated, together with an ISRE (also known as PRDIII or IRF-E)-luciferase reporter (**f**), IFN $\beta$ -luciferase reporter (**g**), and NF- $\kappa$ B-luciferase reporter (**h**), followed by stimulation of cGAMP for 8 h. Luciferase activity was then measured. **i** and **j**, HEK293T cells were transfected as indicated, followed by stimulation of cGAMP for 8 h. qRT-PCR of the expression of the indicated genes was then performed. **k**, HEK293T cells were transfected as indicated. Cell lysates were prepared the indicated times after cGAMP stimulation, and analyzed by Western blot. Data represent mean  $\pm$  s.e.m. from four (**f-h**) or three (**a-e**, **i**, and **j**) independent experiments. \*\*P < 0.005, \*\*\*P < 0.001, NS, not significant (one-way ANOVA).

# Supplementary Figure 14

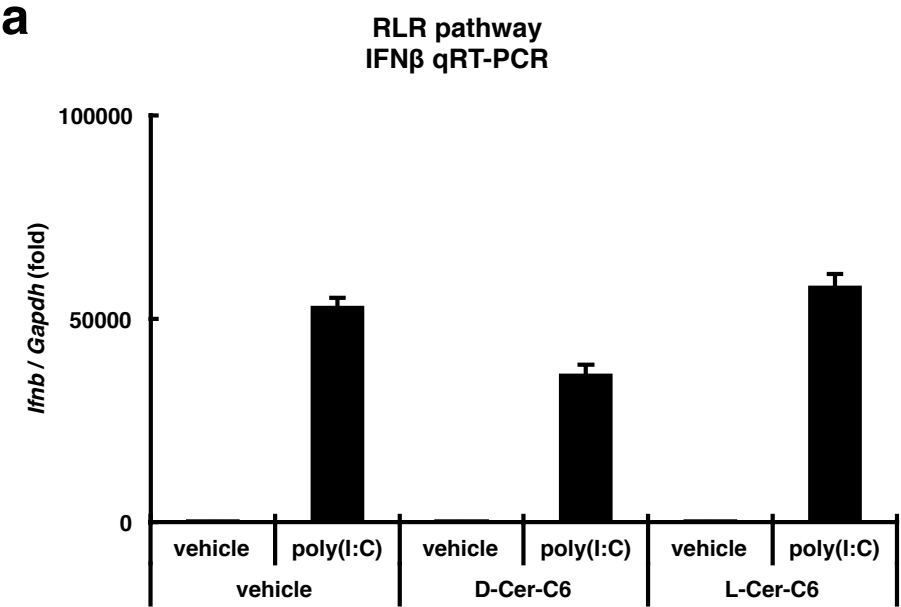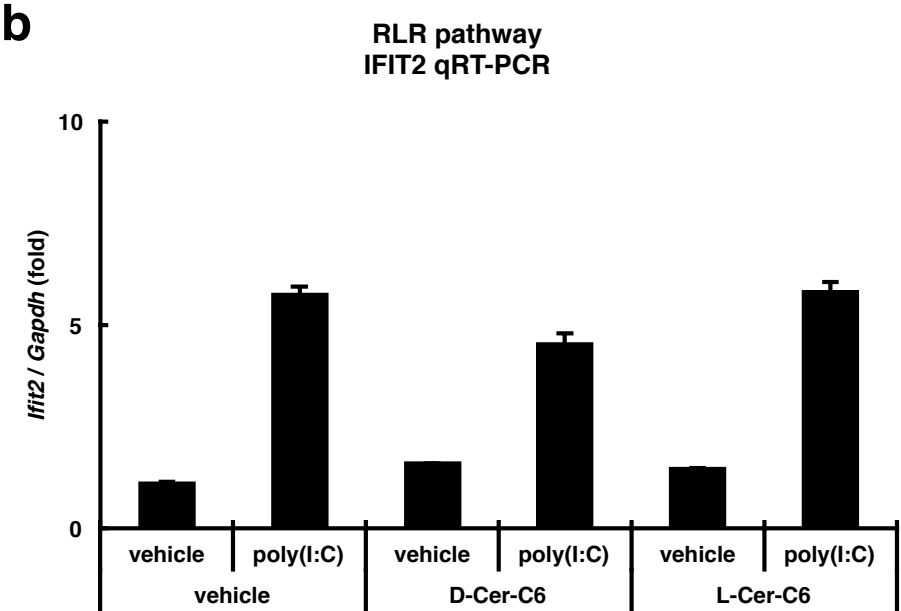

**Supplementary Figure 14. The effect of ceramide-C6 on the RLR pathways.** **a** and **b**, qRT-PCR of the expression of indicated genes in MEFs that were pretreated with 20  $\mu$ M D-ceramide-C6 or L-ceramide-C6 for 1 h and then stimulated with the transfection of poly (I:C) for 3 h to activate the RLR pathway.

# Supplementary Figure 15

**a**

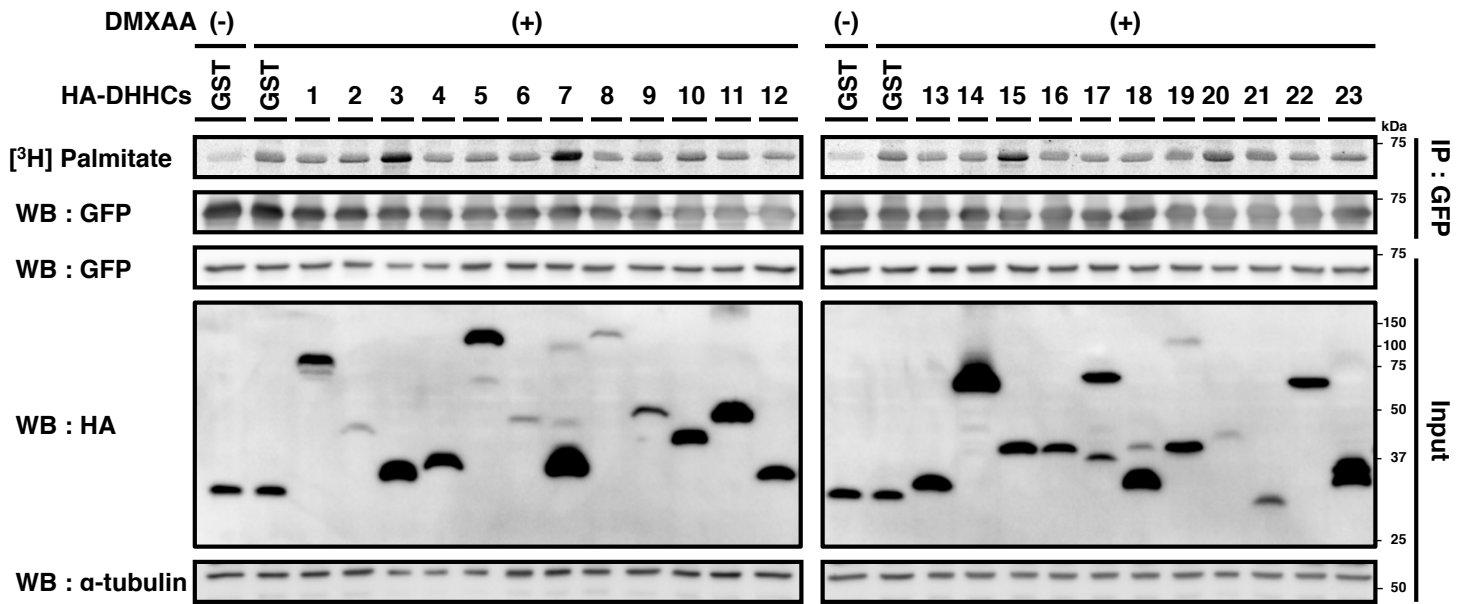

**b**

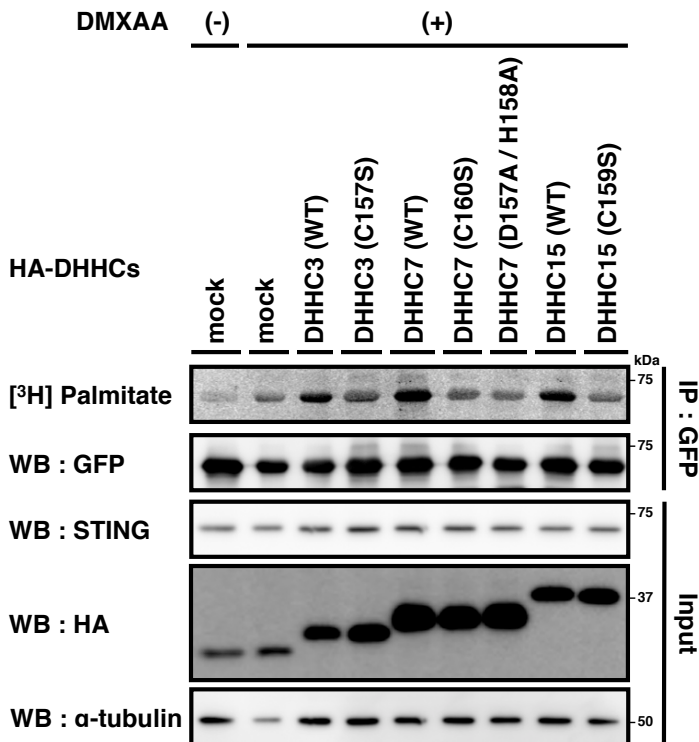

**c**

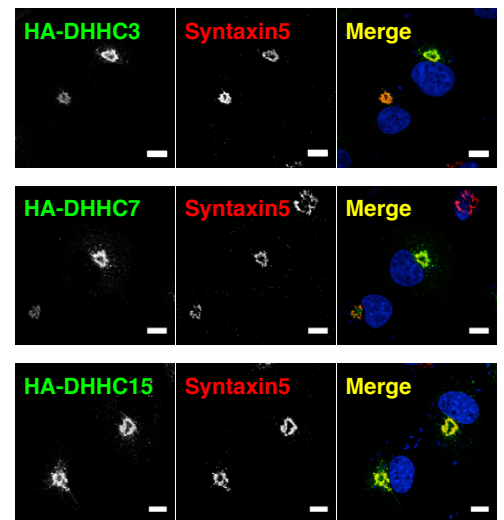

**Supplementary Figure 15. Overexpression of DHHC3, DHHC7, or DHHC15 increases the palmitoylation of STING.** **a**, emsCOS-1 cells were transfected with HA-DHHCs as indicated, metabolically labelled, and analyzed by Western blot and autoradiography. **b**, Cells were transfected with individual DHHCs (WT) or DHHC mutants (C>S or DH>AA) that lack palmitoylation activity, metabolically labelled, and analyzed by Western blot and autoradiography. **c**, COS-1 cells were transfected with HA-DHHCs, fixed, permeabilized, and co-stained for syntaxin5 (a Golgi protein). Scale bars, 10 μm.



# Supplementary Figure 16

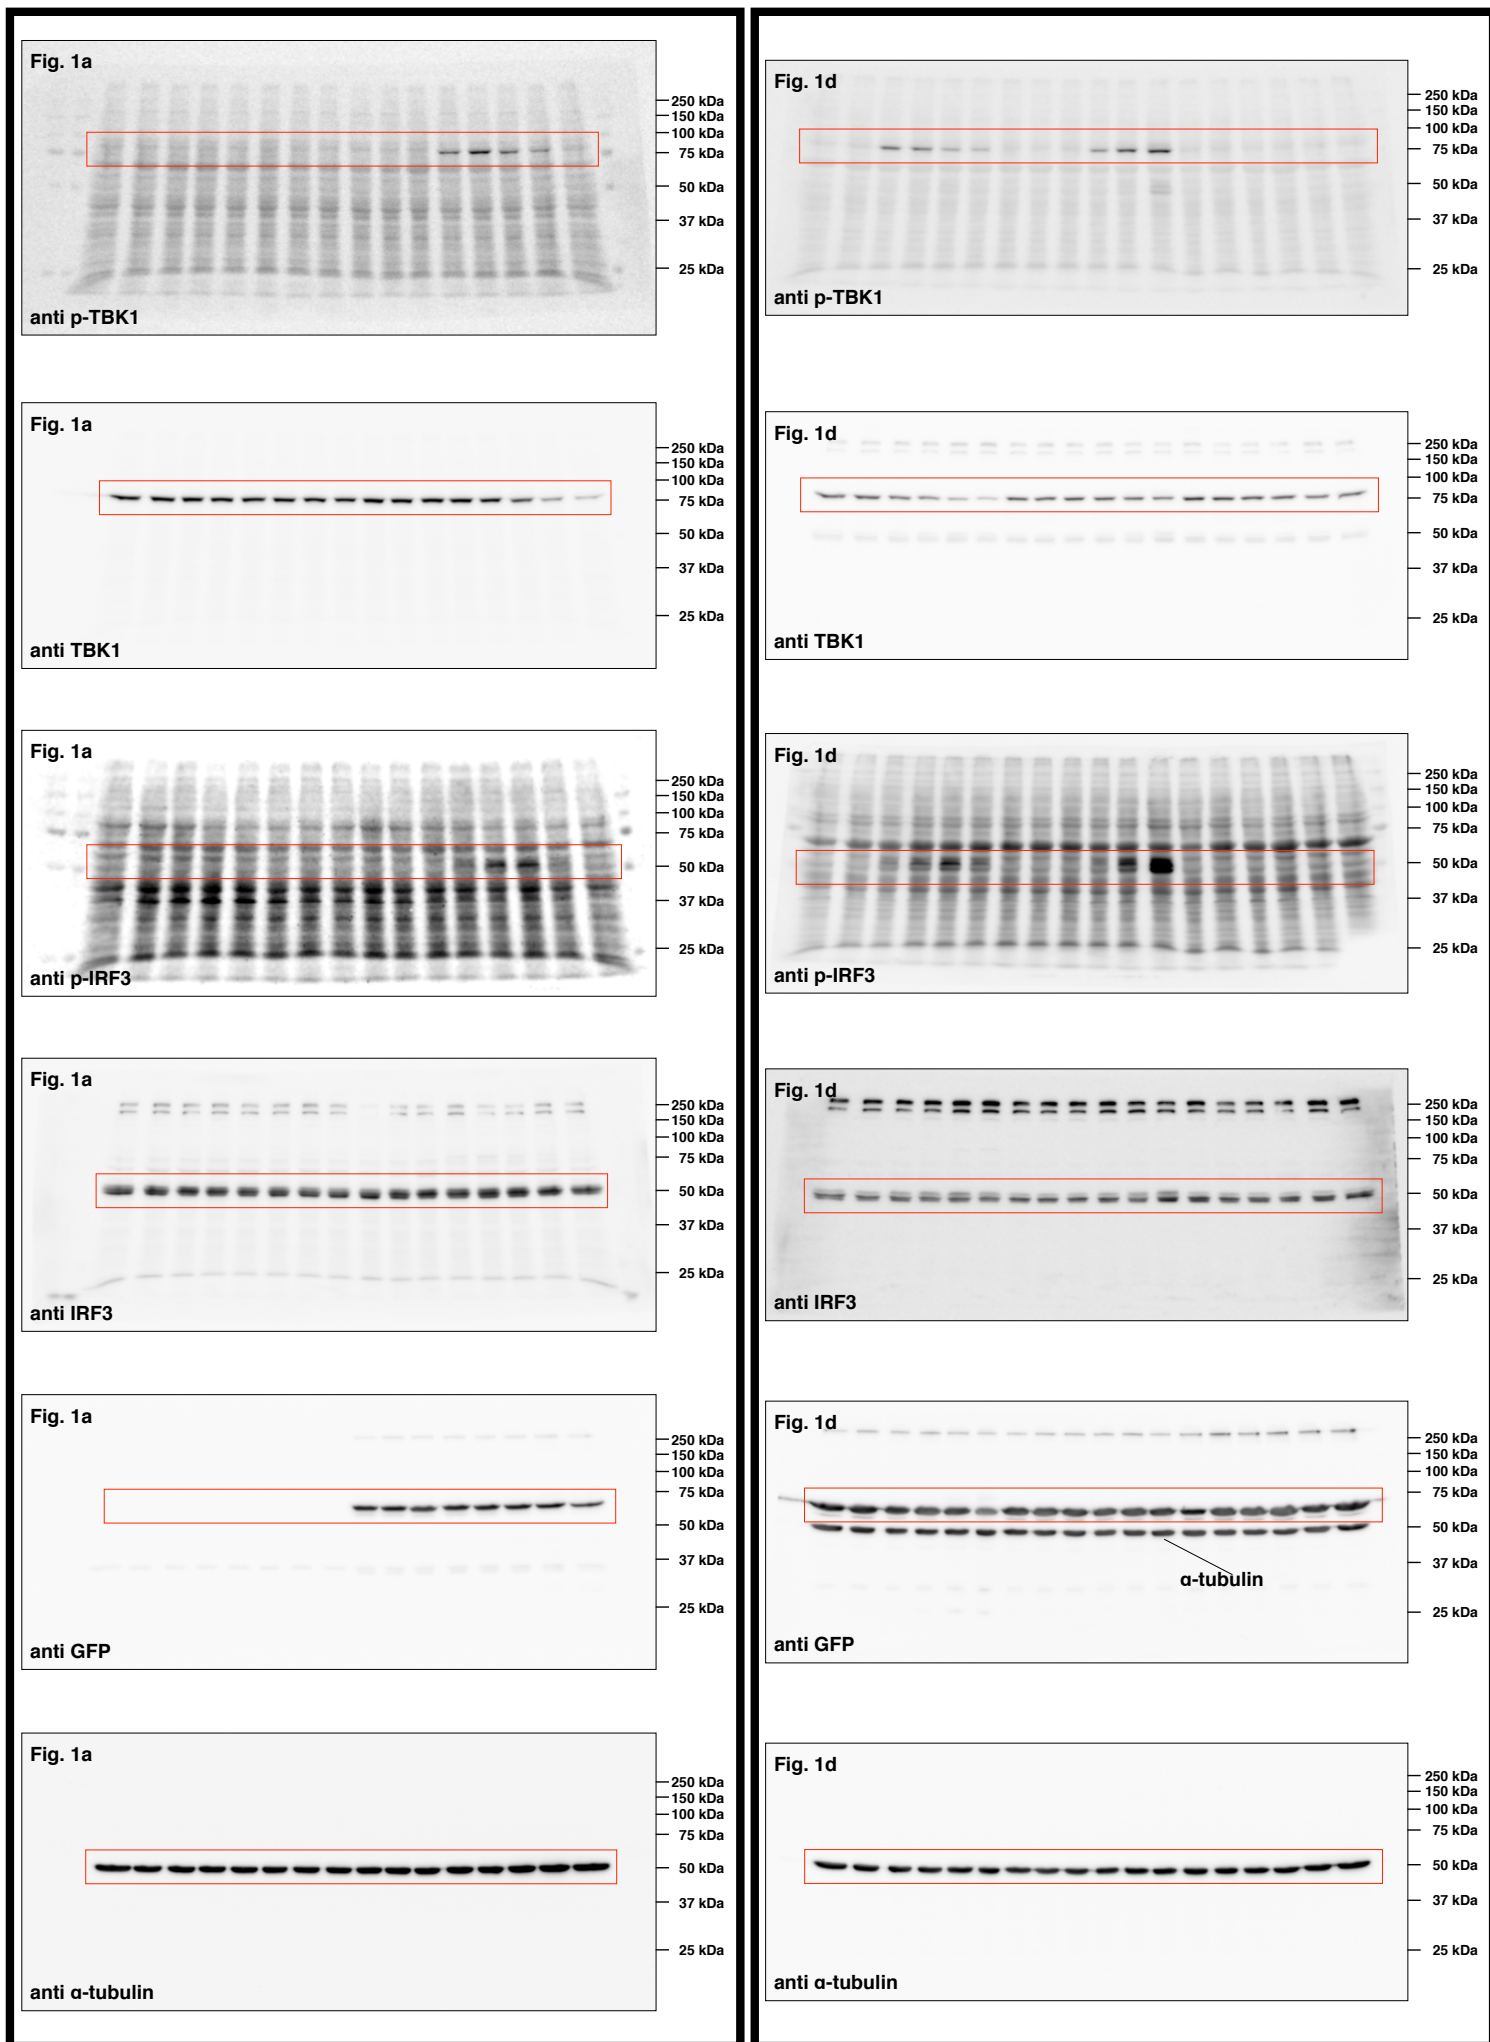

Supplementary Figure 16. Original Western blotting images used in this study.

# Supplementary Figure 16 (continued)

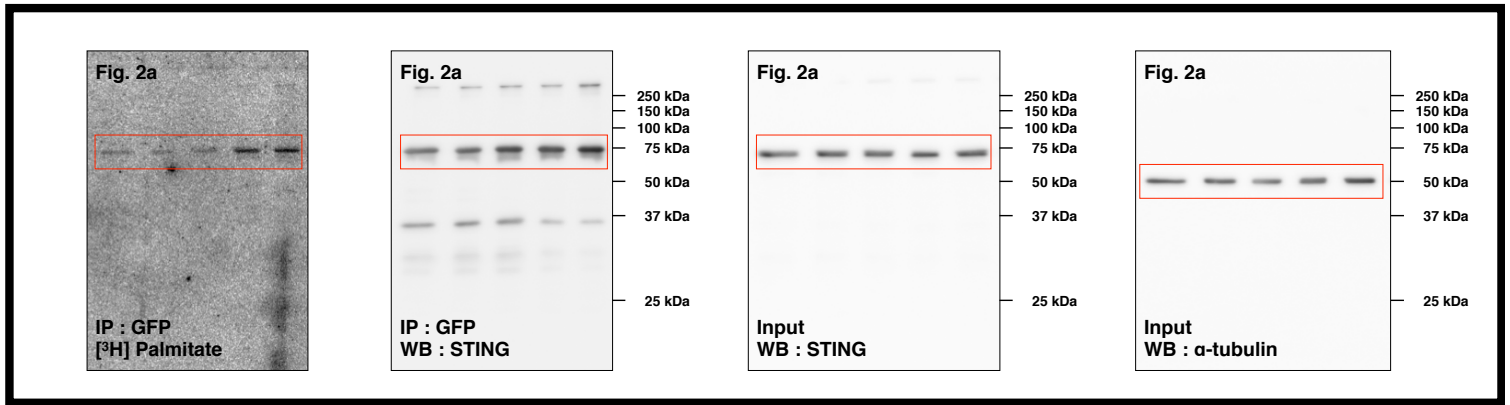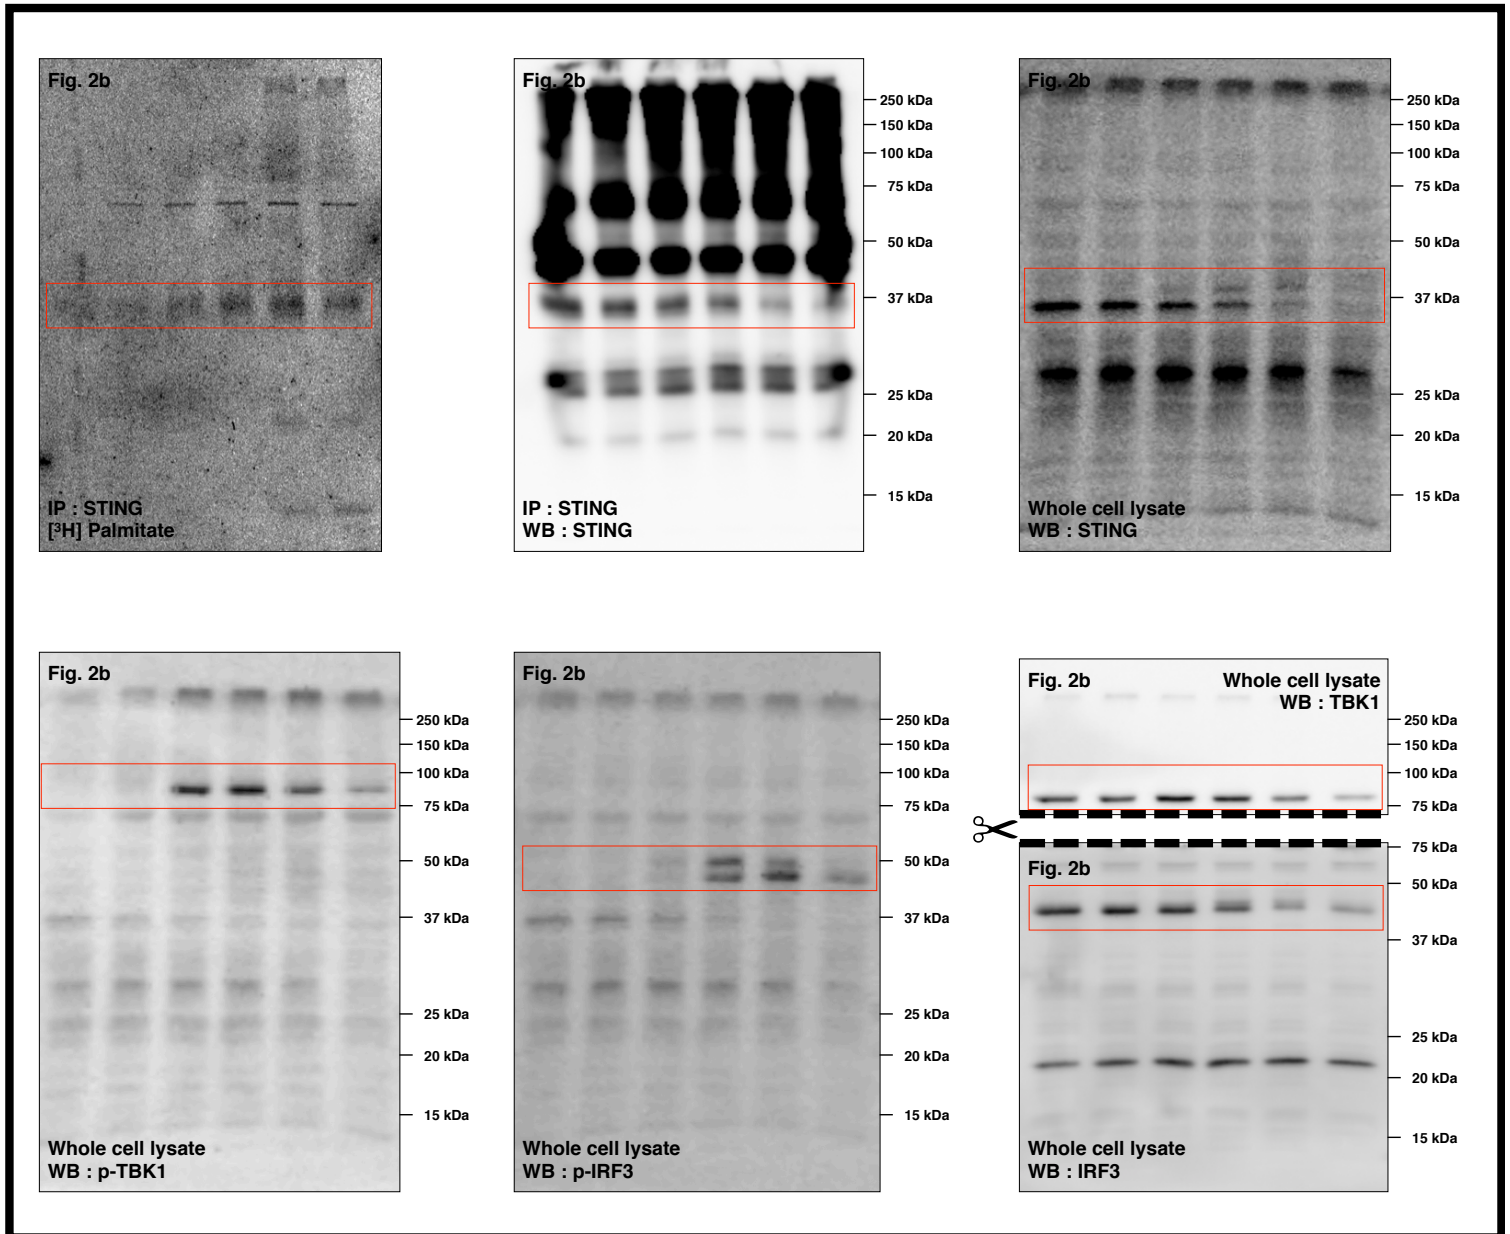

Supplementary Figure 16 (continued). Original Western blotting images used in this study.

# Supplementary Figure 16 (continued)

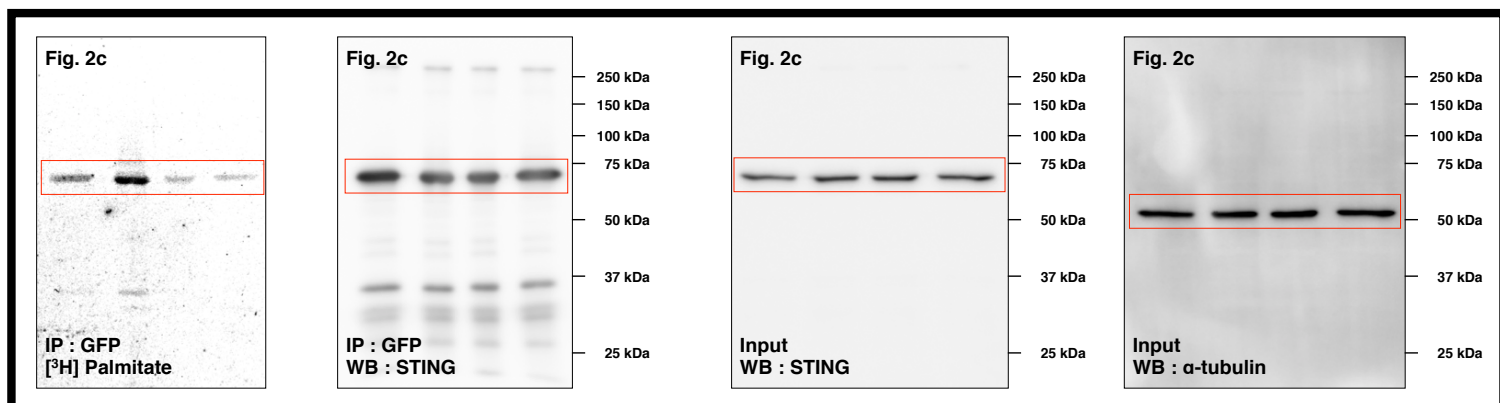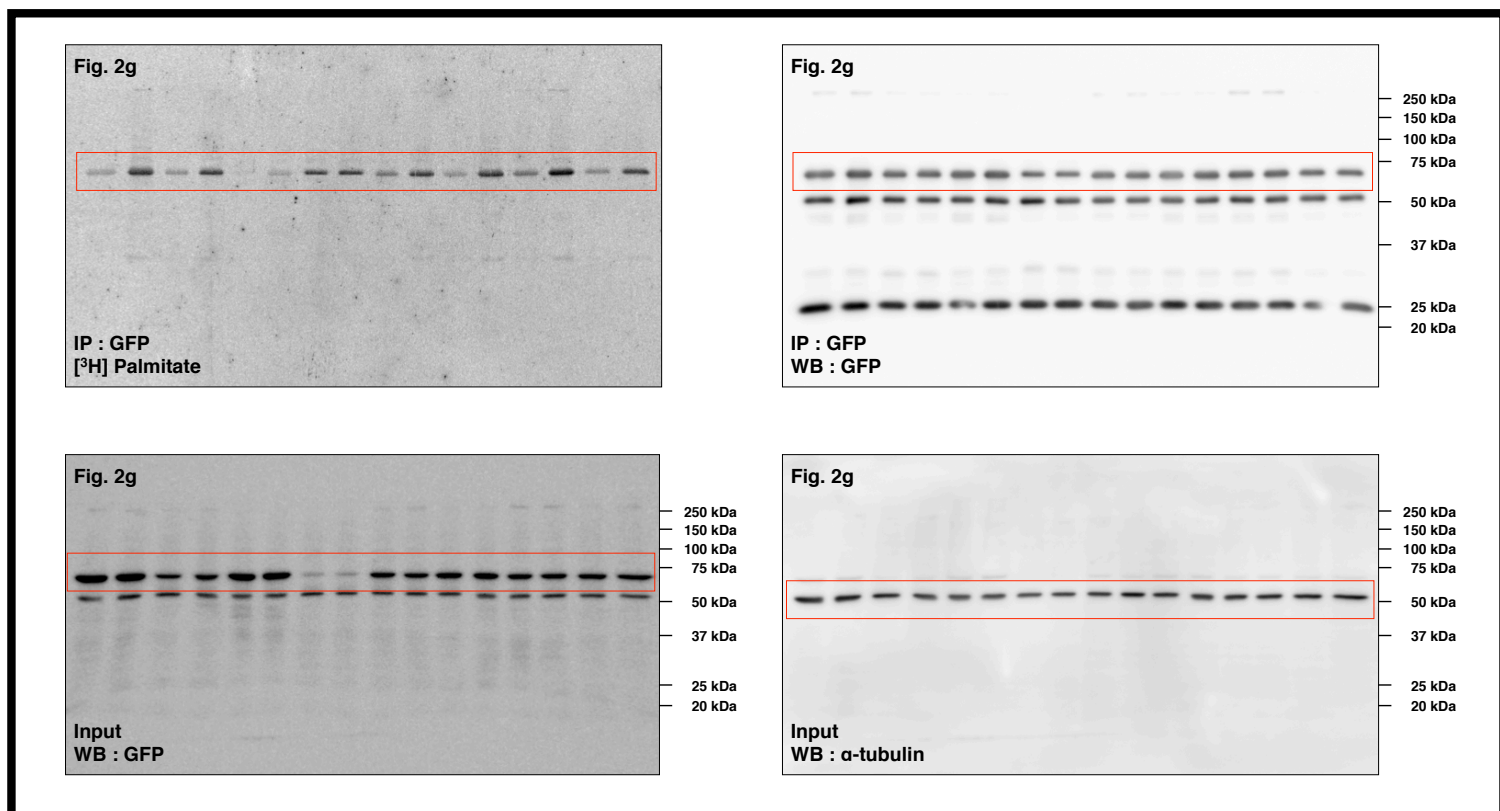

Supplementary Figure 16 (continued). Original Western blotting images used in this study.

# Supplementary Figure 16 (continued)

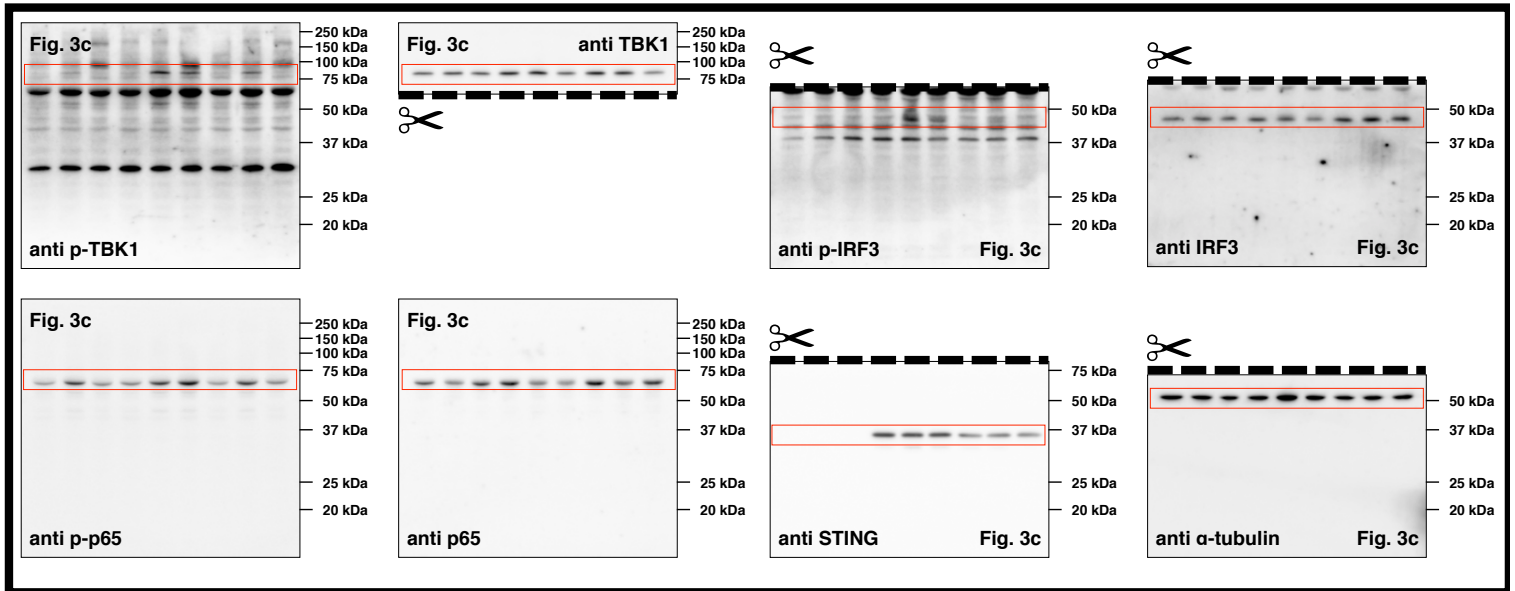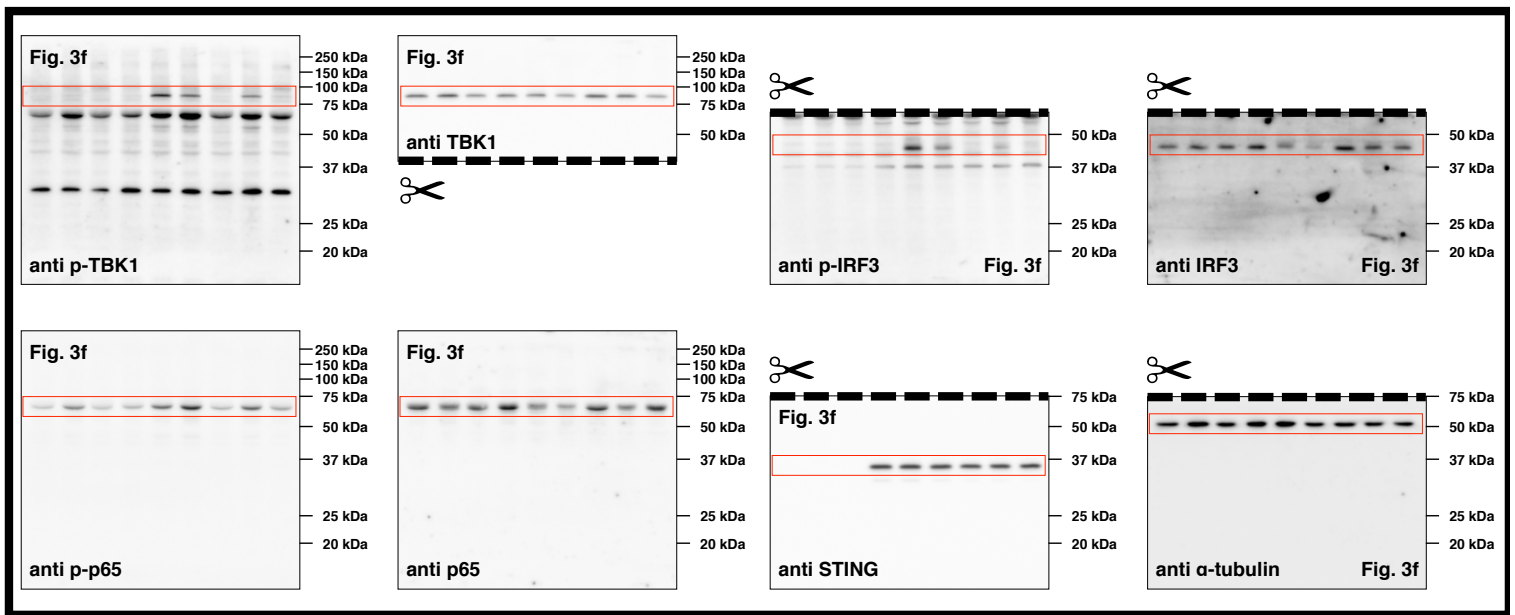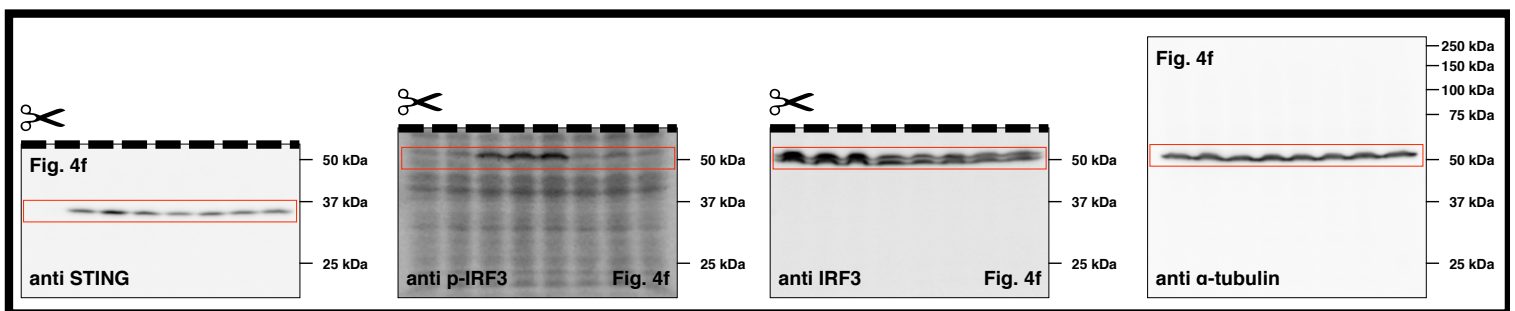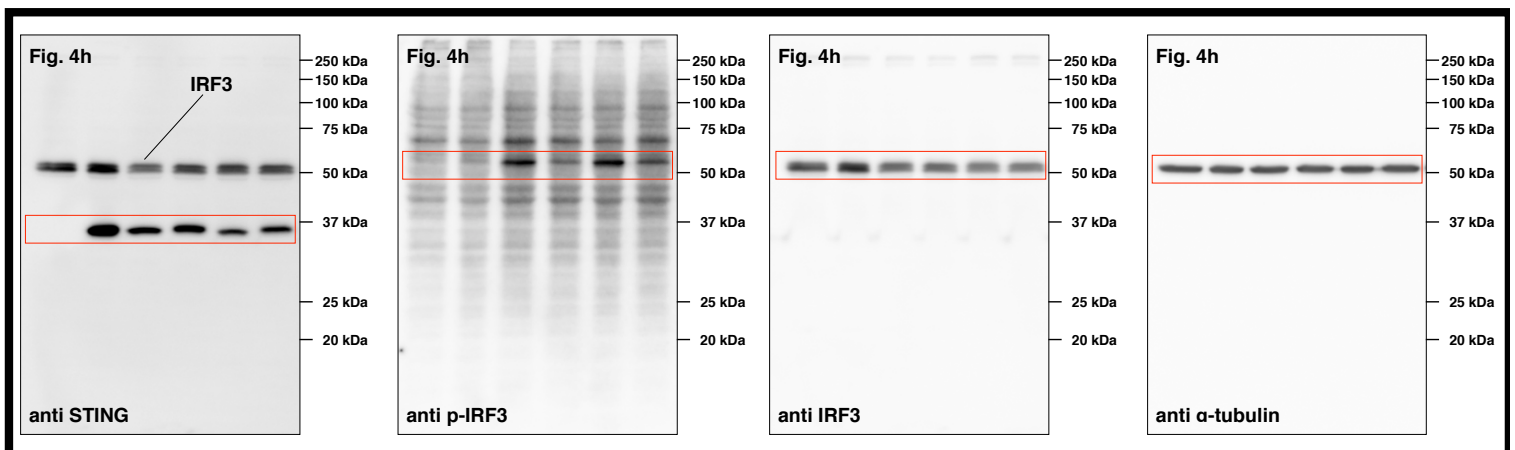

Supplementary Figure 16 (continued). Original Western blotting images used in this study.

# Supplementary Figure 16 (continued)

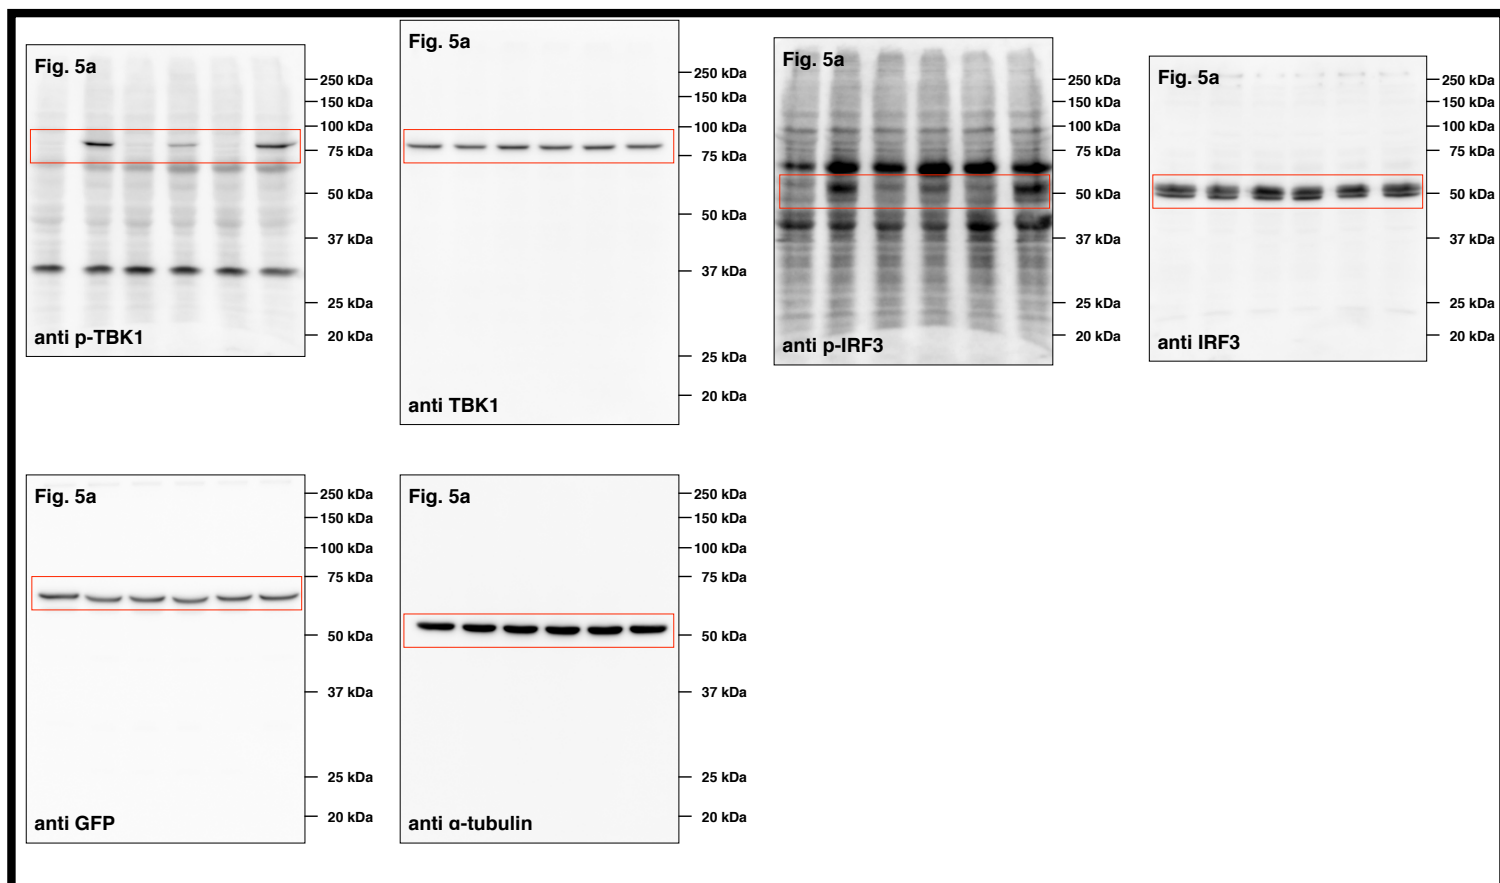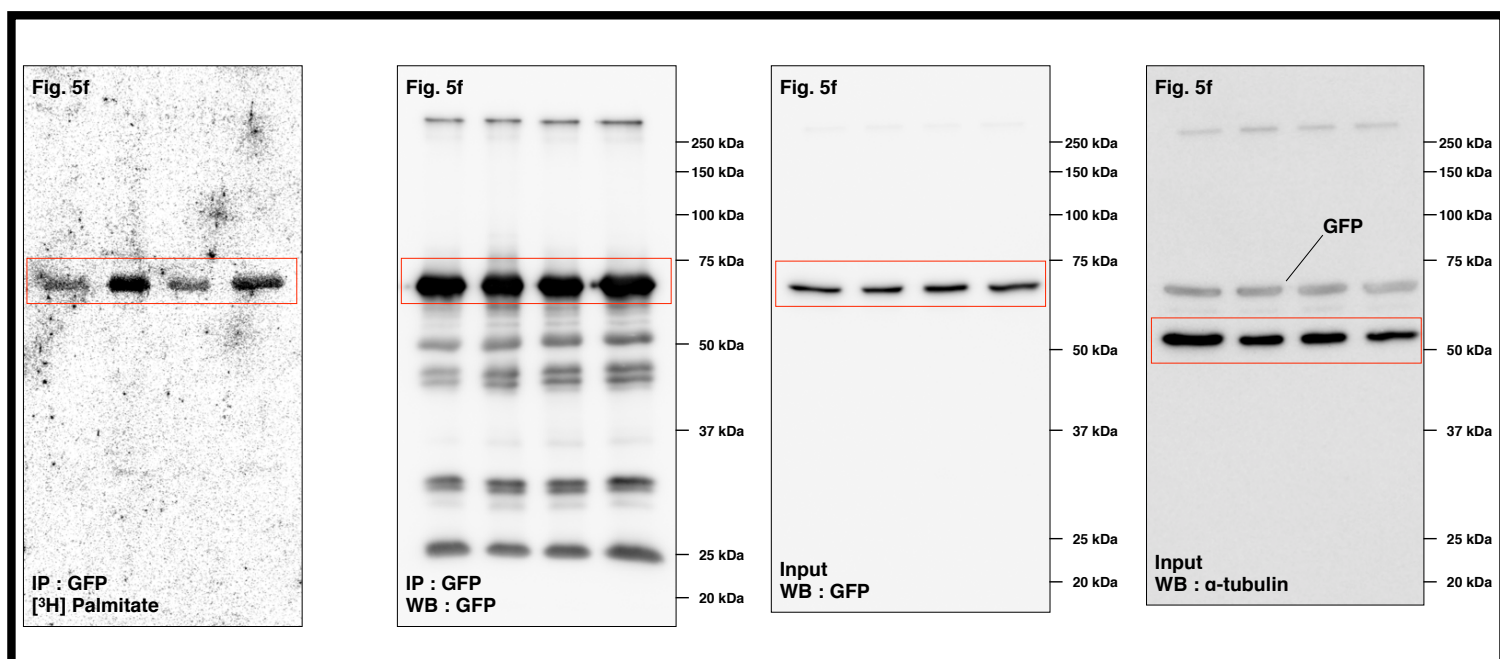

Supplementary Figure 16 (continued). Original Western blotting images used in this study.

# Supplementary Figure 16 (continued)

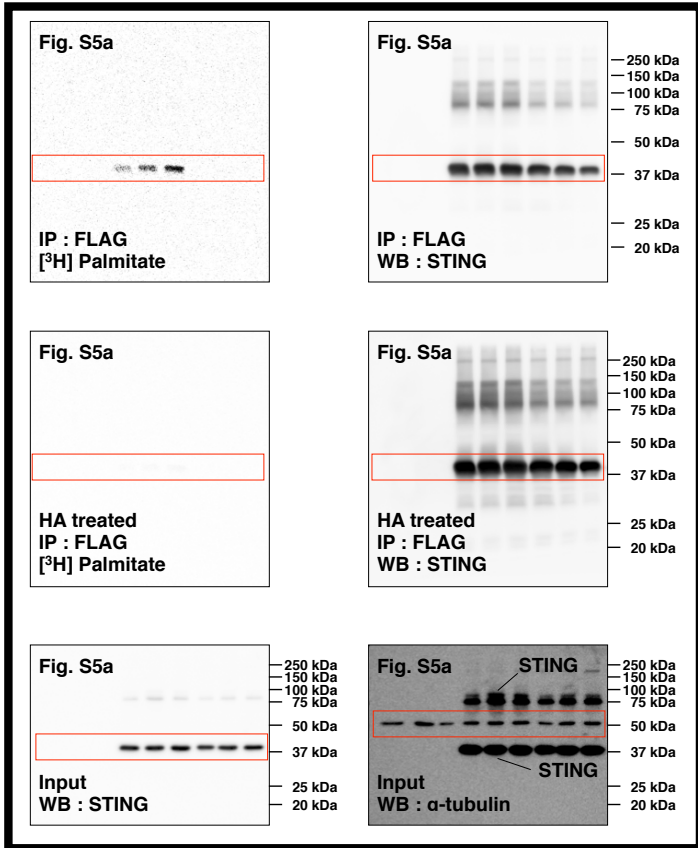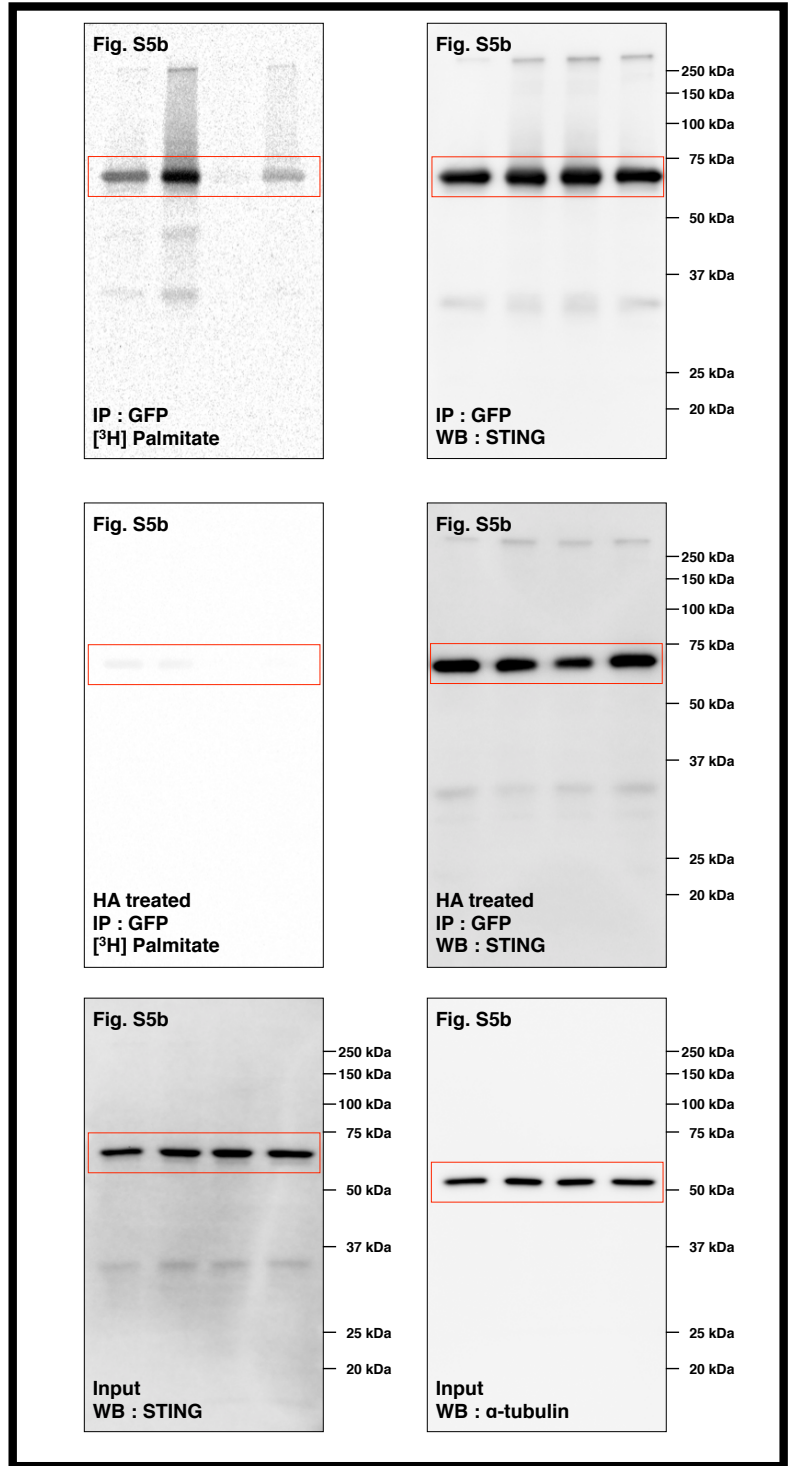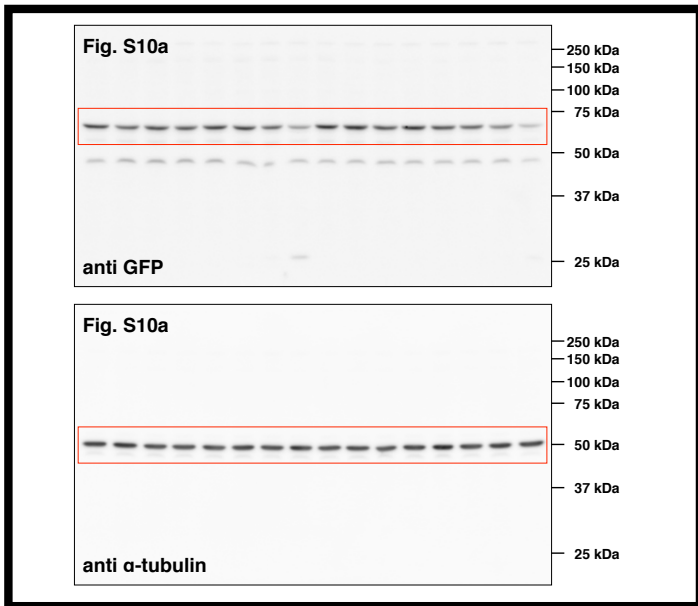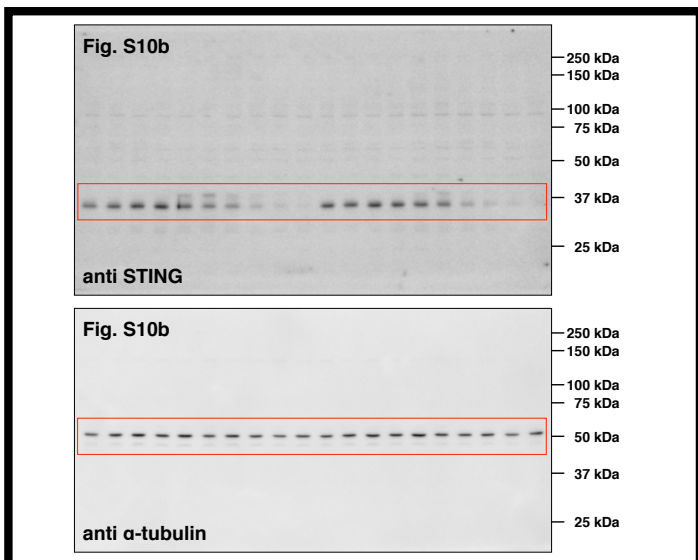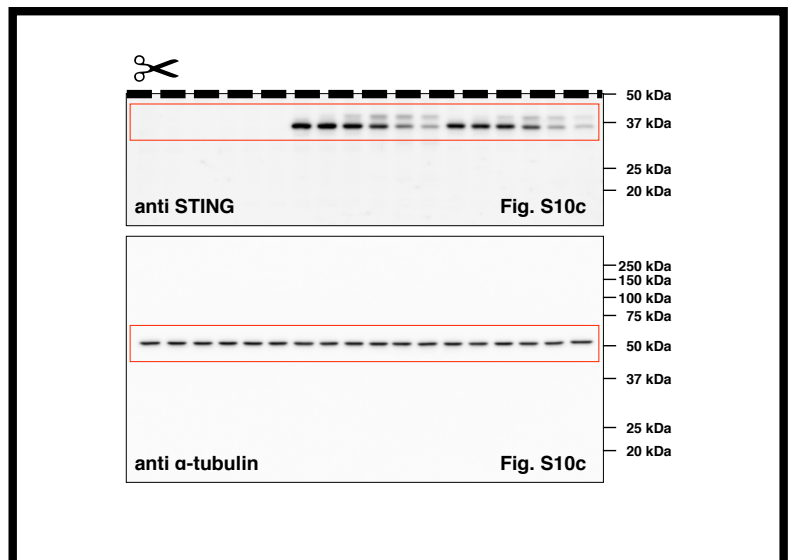



# Supplementary Figure 16 (continued)

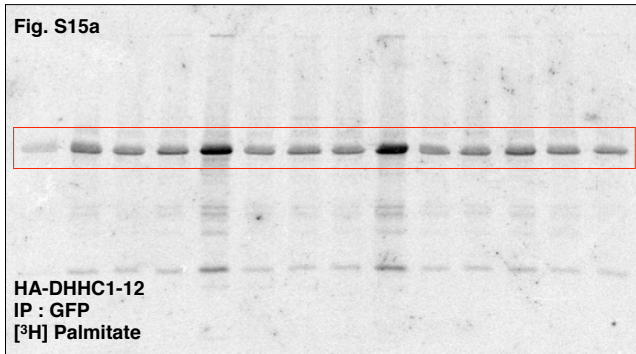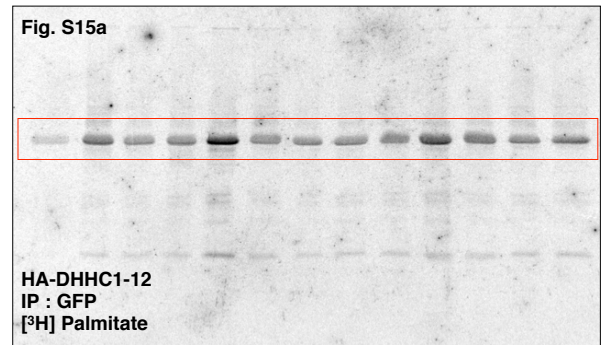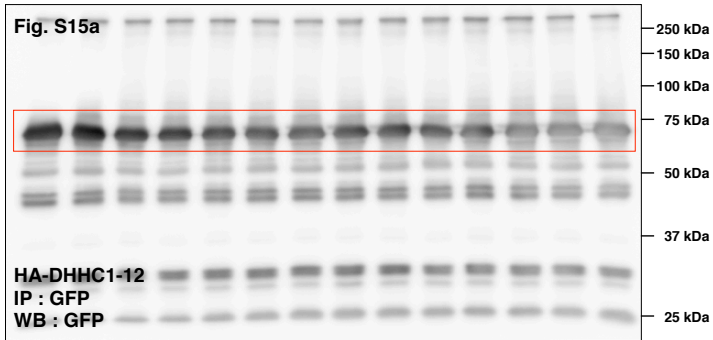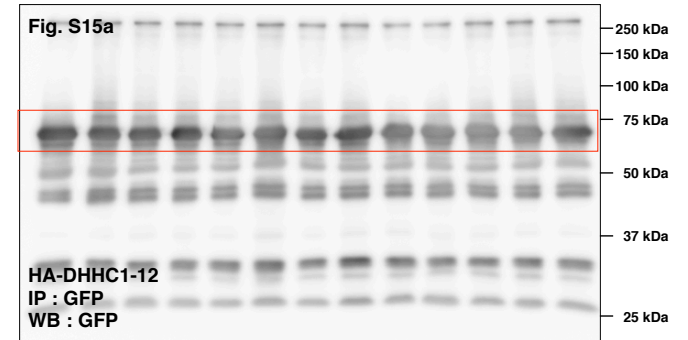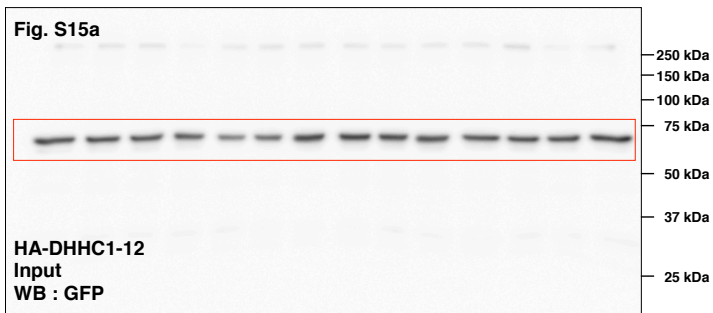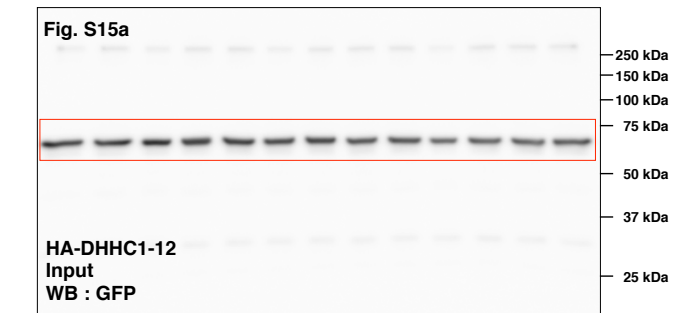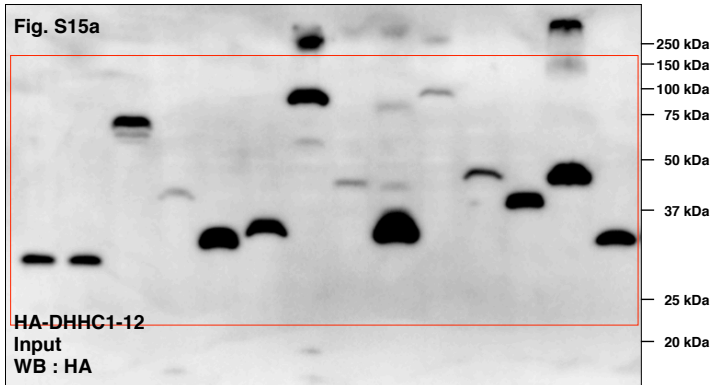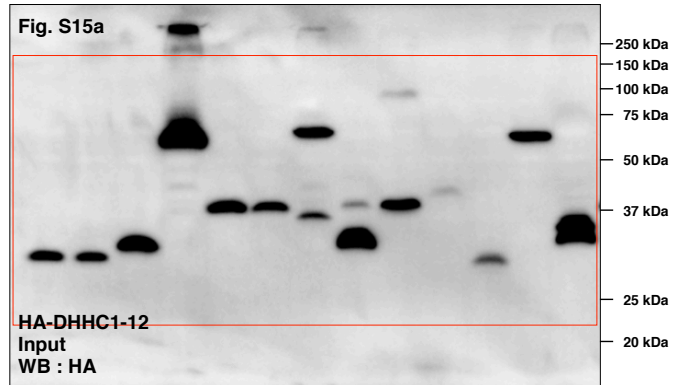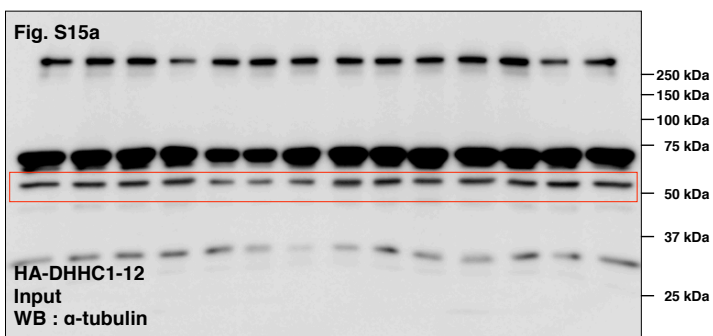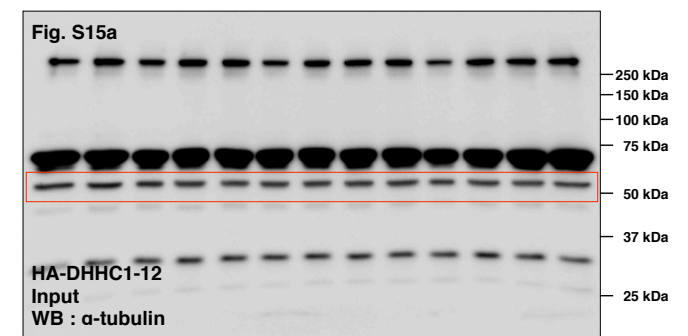

Supplement: ncomms11932-s1.pdf [file ncomms11932-s1.pdf]
